# Supplementary material for: Highly selective acid-catalyzed olefin isomerization of limonene to terpinolene by kinetic suppression of overreactions in a confined space of porous metal–macrocycle frameworks
Source: Royal Society of Chemistry journal article supplement (doi:10.1039/d2sc01561g), 2022-01-01
Supplement: d2sc01561g1.pdf [file d2sc01561g1.pdf]

This version of the ESI published 03/08/2022 replaces the previous version published 03/06/2022.  
Figure S18 is replaced with a corrected version.

## *Electronic Supplementary Information (ESI)*

### **Highly selective acid-catalyzed olefin isomerization of limonene to terpinolene by kinetic suppression of the overreactions in a confined space of porous metal-macrocyclic framework**

Wei He, Shohei Tashiro\* and Mitsuhiko Shionoya\*

*Department of Chemistry, Graduate School of Science, The University of Tokyo, 7-3-1 Hongo,  
Bunkyo-ku, Tokyo 113-0033, Japan*

- **1. Materials and methods** page S2
- **2. Preparation and characterization of 2-NBSA@MMF** page S2
- **3. Isomerization of (+)-limonene using 2-NBSA@MMF and 2-NBSA·H<sub>2</sub>O** page S7
- **4. Examination of the inhibitory effects of additives on the over-isomerization** page S14
- **5. Crystal structures of MMF soaked in a solution of terpenes** page S19
- **6. Cyclization of nerol using 2-NBSA@MMF and 2-NBSA·H<sub>2</sub>O** page S25
- **7. References** page S29

## 1. Materials and methods

Metal–macrocycle framework (MMF) and macrocyclic ligand **L** were prepared according to our procedure.<sup>1</sup> MMF crystals were washed with CH<sub>3</sub>CN and then used for guest incorporation. 2-Nitrobenzenesulfonic acid monohydrate (2-NBSA·H<sub>2</sub>O) was purchased from TCI Co. Ltd. 2-NBSA@MMF was prepared according to a soaking-and-washing procedure which we developed to immobilize *p*-toluenesulfonic acid in MMF.<sup>2</sup> The detailed procedure is described on page S2. The previously reported catalyst, *p*-TsOH@MMF, was also prepared according to our procedure.<sup>2</sup> Commercially available CHCl<sub>3</sub> and CDCl<sub>3</sub> were passed through basic Al<sub>2</sub>O<sub>3</sub> before use to remove a trace amount of HCl or DCl. In this study, only the reaction products that could be directly compared with the standard samples by <sup>1</sup>H NMR spectra were attributed. For instance, (+/–)-limonene, terpinolene (**2**), α-terpinene (**3**), γ-terpinene (**4**) and *p*-cymene (**5**) were identified by matching their <sup>1</sup>H NMR resonances to commercial samples (**2** was also identified by <sup>13</sup>C NMR analysis). Terpene substrates, terpenoid substrates, standards for product assignment, solvents, organic and inorganic reagents were all commercially available, and used without further purification.

NMR spectroscopic measurements were performed using a Bruker AVANCE 500 spectrometer. <sup>1</sup>H NMR spectra are calibrated as below: Si(CH<sub>3</sub>)<sub>4</sub> = 0 ppm in CDCl<sub>3</sub>, CHD<sub>2</sub>SOCD<sub>3</sub> = 2.50 ppm in DMSO-*d*<sub>6</sub>. FT-IR spectra were recorded on a JASCO FT/IR-4200 spectrometer using a ZnSe attenuated total reflection (ATR) method. Single-crystal XRD (ScXRD) analyses were performed using an XtaLAB P200 system diffractometer with CuKα-radiation, and the obtained data were analyzed using an Olex2 software package<sup>3</sup> except for refinement, which was performed using a SHELXL-2018/3 program suite.<sup>4</sup> Several restraints were applied to MMF and guest molecules in all the crystal structures. Hydrogen atoms were placed at the calculated positions and refined using a riding model. The occupancies of the guest molecules were refined based on the electron densities using the free variables of the SHELXL-2018/3 program. In assigning guest molecules, all Q peaks above 2.0, except for the ghost peaks around Pd, were assigned by the least-square refinement, and all Q peaks above 1.4 were tested for guest search. The X-ray structures were displayed using the PyMOL program. Electron density maps were generated using the ShelXle program.<sup>5</sup> The non-covalent interactions were analyzed by the reduced density gradient method<sup>6,7</sup> using the NCIPLOT program<sup>8</sup> and visualized by the VMD program.<sup>9</sup>

## 2. Preparation and characterization of 2-NBSA@MMF

### 2.1 Procedures for the preparation of 2-NBSA+MMF and 2-NBSA@MMF crystals

MMF crystals (ca. 0.5 mg) were soaked in a CH<sub>3</sub>CN solution of 2-NBSA·H<sub>2</sub>O (1.0 M, 100 μL, 100 μmol) in a capped micro-tube at 298 K for 24 h to obtain 2-NBSA+MMF crystals. Resulting 2-NBSA+MMF crystals were washed with a small amount of CH<sub>3</sub>CN (ca. 100 μL), collected by

filtration, then washed again with  $\text{CHCl}_3$  (ca. 800  $\mu\text{L}$ ). The resulting 2-NBSA@MMF crystals were immediately used for catalytic reactions or characterization. **Caution!** A  $\text{CH}_3\text{CN}$  solution of 2-NBSA may corrode nitrile gloves, so it is better to wear polyethylene gloves outside the nitrile gloves when handling.

## 2.2 Crystal structure of 2-NBSA+MMF and 2-NBSA@MMF

One 2-NBSA+MMF or 2-NBSA@MMF crystal was picked up separately in a micro loop and immediately mixed with paratone oil and single-crystal XRD was measured at 93 K.

### Crystal data for 2-NBSA+MMF

Crystal data for  $(\text{Pd}_3\text{LCl}_6)_2 \cdot (2\text{-NBSA})_{0.37} \cdot (\text{CH}_3\text{CN}) \cdot (\text{H}_2\text{O})_{0.87}$ :  $\text{C}_{88.2}\text{H}_{87.5}\text{Cl}_{12}\text{N}_{13.4}\text{O}_{2.7}\text{Pd}_6\text{S}_{0.4}$ ,  $F_w = 2453.43$ , crystal dimensions  $0.14 \times 0.15 \times 0.22 \text{ mm}^3$ , monoclinic, space group  $P2_1/c$ ,  $a = 19.5405(2)$ ,  $b = 51.93156(5)$ ,  $c = 14.3152(1) \text{ \AA}$ ,  $\beta = 90.587(1)^\circ$ ,  $V = 14525.8(2) \text{ \AA}^3$ ,  $Z = 4$ ,  $\rho_{\text{calcd}} = 1.122 \text{ g cm}^{-3}$ ,  $\mu = 8.23 \text{ mm}^{-1}$ ,  $T = 93 \text{ K}$ ,  $\lambda(\text{CuK}\alpha) = 1.54187 \text{ \AA}$ ,  $2\theta_{\text{max}} = 148.6^\circ$ , 168241/28625 reflections collected/unique ( $R_{\text{int}} = 0.0517$ ),  $R_1 = 0.1209$  ( $I > 2\sigma(I)$ ),  $wR_2 = 0.3983$  (for all data), GOF = 1.665, largest diff. peak and hole 4.110/−1.700  $\text{e}\text{\AA}^{-3}$ . CCDC deposit number 2133387. Several restraints were applied to the MMF and the guest molecules to prevent the structure from collapsing during the least-squares refinement.

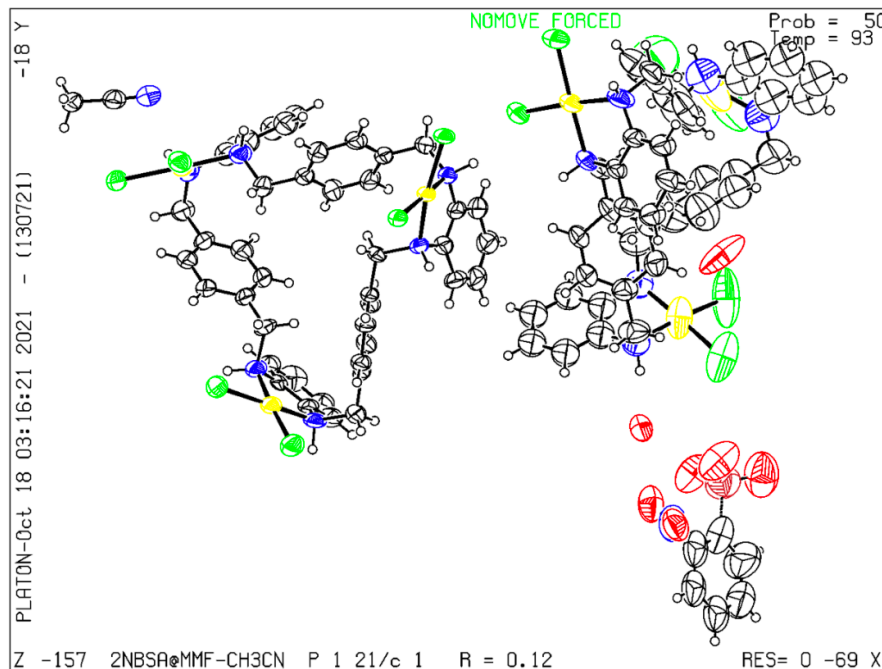

**Fig. S1** ORTEP drawing of 2-NBSA+MMF at the 50% probability level. Color: C black, N blue, O red, Cl green, S deep red and Pd yellow.

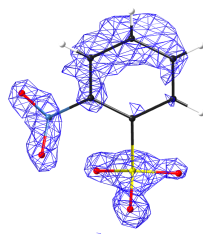

**Fig. S2** Electron density maps of 2-NBSA in the crystal structure of 2-NBSA+MMF (contour level:  $1.00 \text{ e}^-/\text{\AA}^3$ ).

### Crystal data for 2-NBSA@MMF

Crystal data for  $(\text{Pd}_3\text{LCl}_6)_2 \cdot (\text{CH}_3\text{CN}) \cdot (\text{H}_2\text{O})$ :  $\text{C}_{86}\text{H}_{87}\text{Cl}_{12}\text{N}_{13}\text{O}_2\text{Pd}_6$ ,  $F_w = 2382.48$ , crystal dimensions  $0.10 \times 0.10 \times 0.21 \text{ mm}^3$ , monoclinic, space group  $P2_1/c$ ,  $a = 19.6017(1)$ ,  $b = 52.3627(4)$ ,  $c = 14.3397(1) \text{ \AA}$ ,  $\beta = 90.600(1)^\circ$ ,  $V = 14717.43(17) \text{ \AA}^3$ ,  $Z = 4$ ,  $\rho_{\text{calcd}} = 1.075 \text{ g cm}^{-3}$ ,  $\mu = 8.06 \text{ mm}^{-1}$ ,  $T = 93 \text{ K}$ ,  $\lambda(\text{CuK}\alpha) = 1.54187 \text{ \AA}$ ,  $2\theta_{\text{max}} = 147.1^\circ$ , 173429/28355 reflections collected/unique ( $R_{\text{int}} = 0.0533$ ),  $R_1 = 0.1080$  ( $I > 2\sigma(I)$ ),  $wR_2 = 0.3596$  (for all data), GOF = 1.546, largest diff. peak and hole  $4.228/-2.216 \text{ e}\text{\AA}^{-3}$ . CCDC deposit number 2133388. Several restraints were applied to the MMF and the guest molecules to prevent the structure from collapsing during the least-squares refinement.

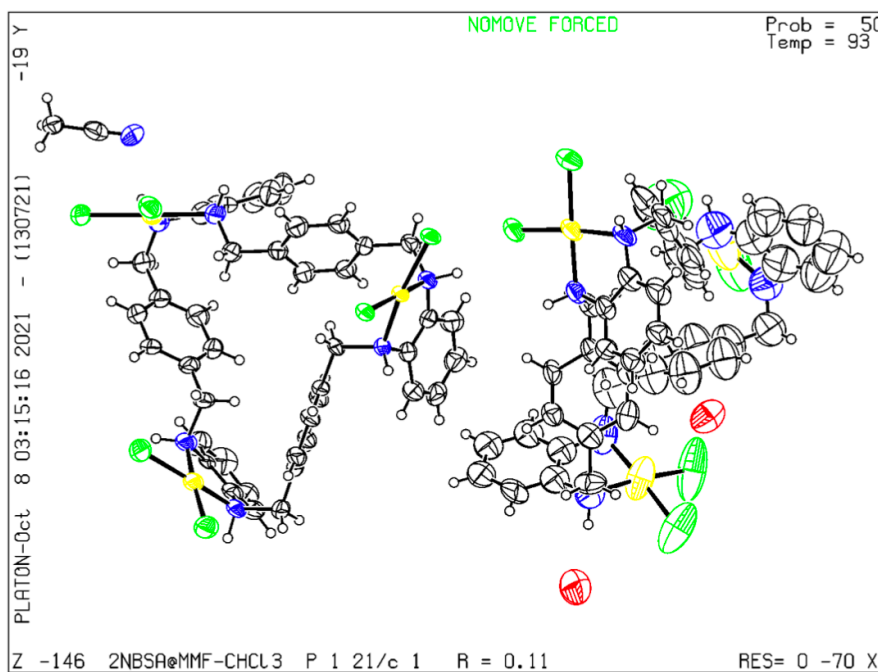

**Fig. S3** ORTEP drawing of 2-NBSA@MMF at the 50% probability level. Color: C black, N blue, O red, Cl green and Pd yellow.

### **2.3 FT-IR measurement of 2-NBSA@MMF**

To confirm the presence of 2-NBSA in the 2-NBSA@MMF crystals, the as-synthesized 2-NBSA@MMF crystals were air-dried on a filter paper for 15 sec, and then examined by ATR-IR measurement at room temperature.

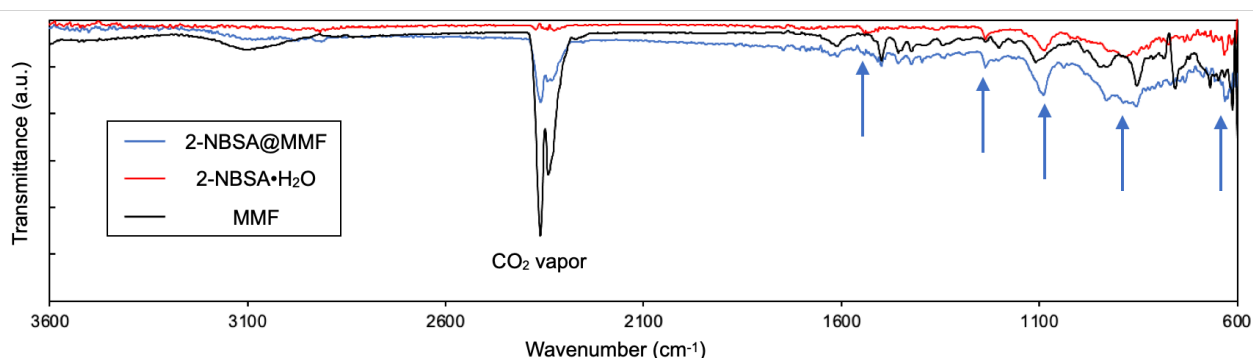

**Fig. S4** FT-IR spectra (ATR, rt) of 2-NBSA@MMF crystals, 2-NBSA·H<sub>2</sub>O, and as-synthesized MMF crystals. The peaks indicated by blue arrows indicate the presence of 2-NBSA in the 2-NBSA@MMF crystals.

#### 2.4 Digestion NMR experiments of 2-NBSA@MMF

To estimate the amount of 2-NBSA in the unit space of 2-NBSA@MMF crystals, the as-synthesized 2-NBSA@MMF crystals were air-dried on a filter paper for 45 sec, then digested DMSO-*d*<sub>6</sub>/DCI-D<sub>2</sub>O ([DCI] = 0.17 M), and <sup>1</sup>H NMR was measured at 300 K. As a result, the amounts of 2-NBSA and CHCl<sub>3</sub> in the unit space of MMF were estimated to be 1.1 and 3.4 molecules, respectively, based on the integral ratio. For 2-NBSA+MMF, the amount of 2-NBSA in the unit space of the MMF was estimated to be 2.8 molecules from the integral ratio. Here, the “unit space” of MMF is defined as a half of the unit cell, and thus corresponds to one unit of a nano-channel of MMF.

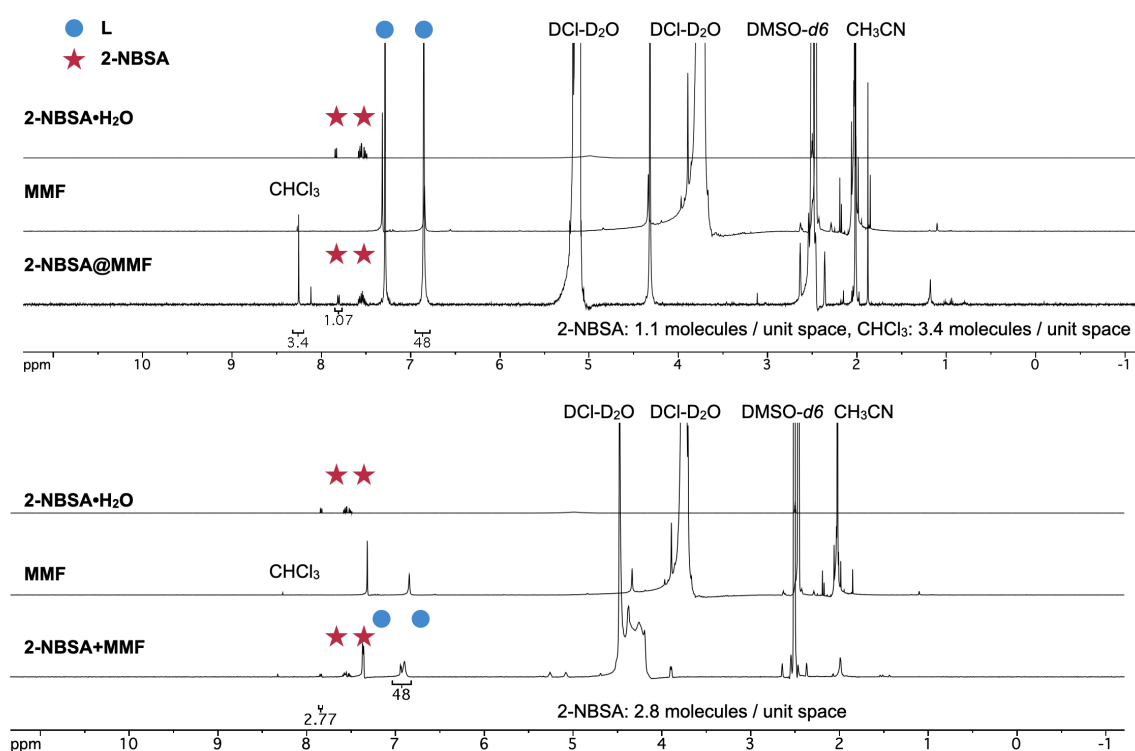

**Fig. S5**  $^1\text{H}$  NMR spectra (500 MHz, 300 K) of 2-NBSA $\cdot$ H $_2$ O, MMF, and 2-NBSA@MMR (top) or 2-NBSA+MMF (bottom) after dissolution. The amounts of 2-NBSA and CHCl $_3$  in the unit space of MMF were estimated and labeled (bottom right). Solvents: DMSO- $d_6$  for 2-NBSA $\cdot$ H $_2$ O; DMSO- $d_6$ /DCI ([DCI] = 0.32 M) for MMF; DMSO- $d_6$ /DCI ([DCI] = 0.17 M) for 2-NBSA@MMF; DMSO- $d_6$ /DCI ([DCI] = 0.22 M) for 2-NBSA+MMF.

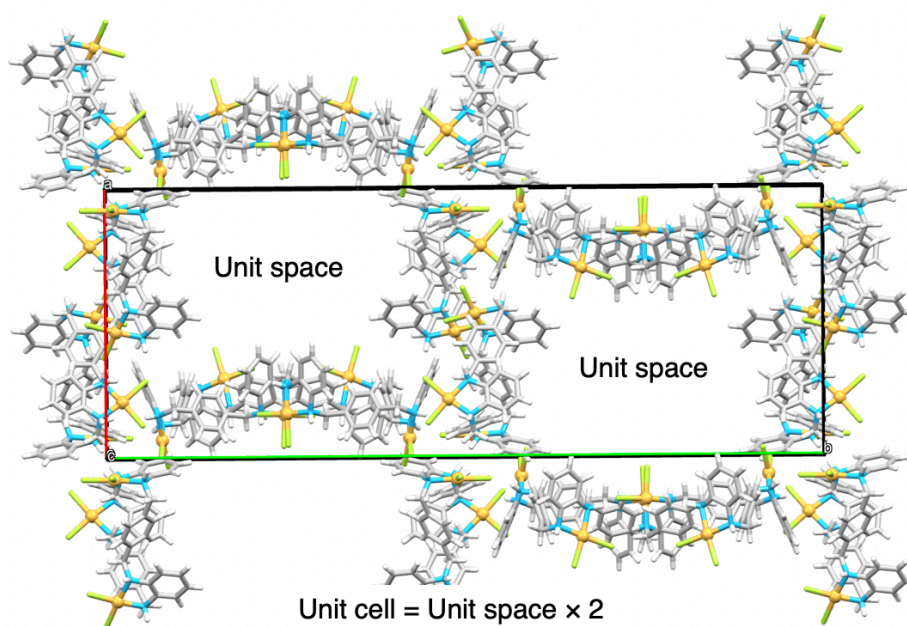

**Fig. S6** The definition of the “unit space” of MMF.

## 2.5 Catalyst quantity of 2-NBSA@MMF

The chemical composition of 2-NBSA@MMF except for water was estimated to be  $(\text{Pd}_3\text{LCl}_6)_4 \cdot (2\text{-NBSA})_{1.1} \cdot (\text{CHCl}_3)_{3.4} \cdot (\text{H}_2\text{O})_n$  from the integral ratios of the  $^1\text{H}$  NMR spectrum (Fig. S5). The number of water molecules included in 2-NBSA@MMF was tentatively estimated to be  $n = 20$  ( $M_w = 5640.8$ ), since previous elemental analysis suggested that the as-synthesized MMF crystals  $(\text{Pd}_3\text{LCl}_6)_4 \cdot (\text{CH}_3\text{CN})_2 \cdot (\text{H}_2\text{O})_{36}$  contained 36 water molecules in its unit space.<sup>1</sup> Therefore, the number  $n$  and the molecular weight  $M_w$  of 2-NBSA @MMF should be within the ranges of  $0 \leq n \leq 36$  and  $5280.5 \leq M_w \leq 5929.1$ , respectively. Therefore, the catalyst quantity of 2-NBSA@MMF used in this study ( $n = 20$ ,  $M_w = 5640.8$ ) falls within the error range of 6% with respect to water content.

## 2.6 Acid-leaching test of 2-NBSA@MMF in CDCl $_3$

To examine whether 2-NBSA elutes from 2-NBSA@MMF into CDCl $_3$  solutions, the as-synthesized 2-NBSA@MMF crystals (ca. 0.5 mg) were soaked in CDCl $_3$  (ca. 1.0 mL) at 298 K for 120 h, and analyzed by  $^1\text{H}$  NMR at 298 K. As the result, acid-leaching was not observed after soaking 2-NBSA@MMF in CDCl $_3$  at 298 K for 120 h.

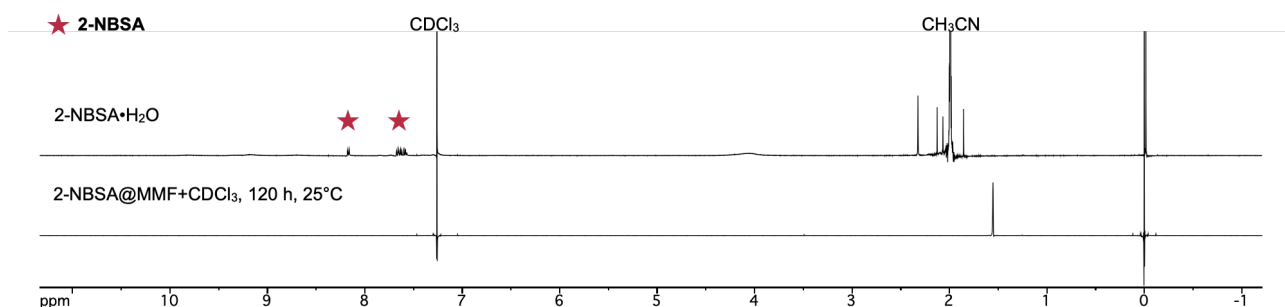

**Fig. S7**  $^1\text{H}$  NMR spectra (500 MHz,  $\text{CDCl}_3$ , 300 K) of a  $\text{CDCl}_3$  solution containing dissolved 2-NBSA· $\text{H}_2\text{O}$  or a solution heterogeneously containing 2-NBSA@MMF crystals.

## 2.7 Catalytic activity tests of 2-NBSA@MMF and *p*-TsOH@MMF

In the heterogeneous reactions, a  $\text{CDCl}_3$  solution of acetaldehyde diethyl acetal (100 mM, 1.0 mM, 100  $\mu\text{mol}$ ) was mixed with 2-NBSA@MMF or *p*-TsOH@MMF (acid in MMF, 1 mol%) in an NMR tube. For the homogeneous reactions, a  $\text{CDCl}_3$  solution of acetaldehyde diethyl acetal (100 mM, 1.0 mM, 99  $\mu\text{mol}$ ) containing 2-NBSA· $\text{H}_2\text{O}$  or *p*-TsOH· $\text{H}_2\text{O}$  (2 mol%) was prepared in an NMR tube. The mixtures were shaken on a shaker at 298 K and monitored by  $^1\text{H}$  NMR spectroscopy (500 MHz  $\text{CDCl}_3$ , 300 K).

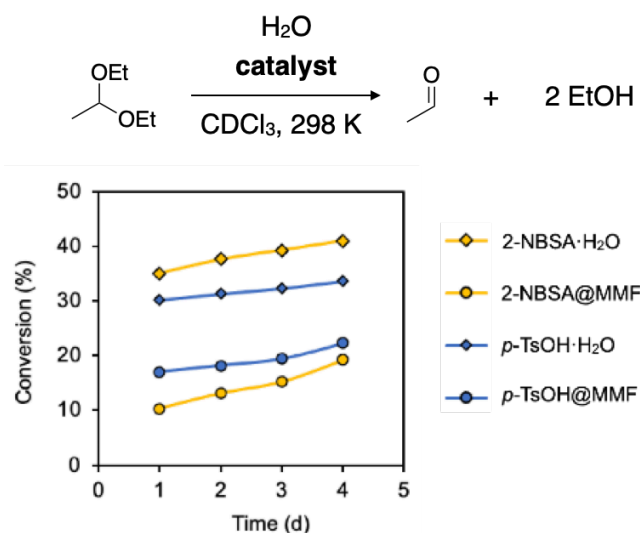

**Fig. S8** Catalytic hydrolysis reaction of acetaldehyde diethyl acetal with 2-NBSA@MMF, *p*-TsOH@MMF, 2-NBSA· $\text{H}_2\text{O}$ , or *p*-TsOH· $\text{H}_2\text{O}$  in  $\text{CDCl}_3$  at 298 K.

## 3. Isomerization of (+)-limonene using 2-NBSA@MMF and 2-NBSA·H<sub>2</sub>O

### 3.1 Procedure for the isomerization of (+)-limonene using 2-NBSA@MMF

Crystals of 2-NBSA@MMF (ca. 0.5 mg, 0.1  $\mu\text{mol}$  of 2-NBSA in MMF, 1 mol%) immediately after preparation and a  $\text{CDCl}_3$  solution of (+)-limonene (**1**) (10 mM, 1.0 mL, 10  $\mu\text{mol}$ ) were placed in an NMR tube. The heterogeneous mixture was shaken on a shaker at 298 K and the time course was monitored by  $^1\text{H}$  NMR measurements (500 MHz,  $\text{CDCl}_3$ , 300 K). The conversion ratios of (+)-

limonene (**1**) and yields of main products were evaluated using 1,1,2,2-tetrachloroethane (9 mM, 1.0 mL, 9  $\mu$ mol) as internal standard. When (+)-limonene (**1**) was treated with 2-NBSA@MMF, 45% of (+)-limonene (**1**) was consumed at 298 K after 51 h, and the formation of terpinolene (**2**) (41% yield, 91% selectivity),  $\alpha$ -terpinene (**3**) (0.6%),  $\gamma$ -terpinene (**4**) (1.7%), and *p*-cymene (**5**) (0.6%) was confirmed. When the reaction was further extended to 100 h at 298 K, 67% of (+)-limonene (**1**) was consumed and the formation of terpinolene (**2**) (50% yield, 75% selectivity),  $\alpha$ -terpinene (**3**) (3%),  $\gamma$ -terpinene (**4**) (4%) and *p*-cymene (**5**) (3%) was confirmed. Next, to further confirm the formation of terpinolene (**2**), a similar reaction mixture was prepared separately under the same conditions and analyzed by  $^{13}\text{C}$  NMR spectroscopy (126 MHz,  $\text{CDCl}_3$ , 300 K) after 57 h. As a result, **2** was identified by matching the  $^{13}\text{C}$  NMR resonances with a commercial sample.

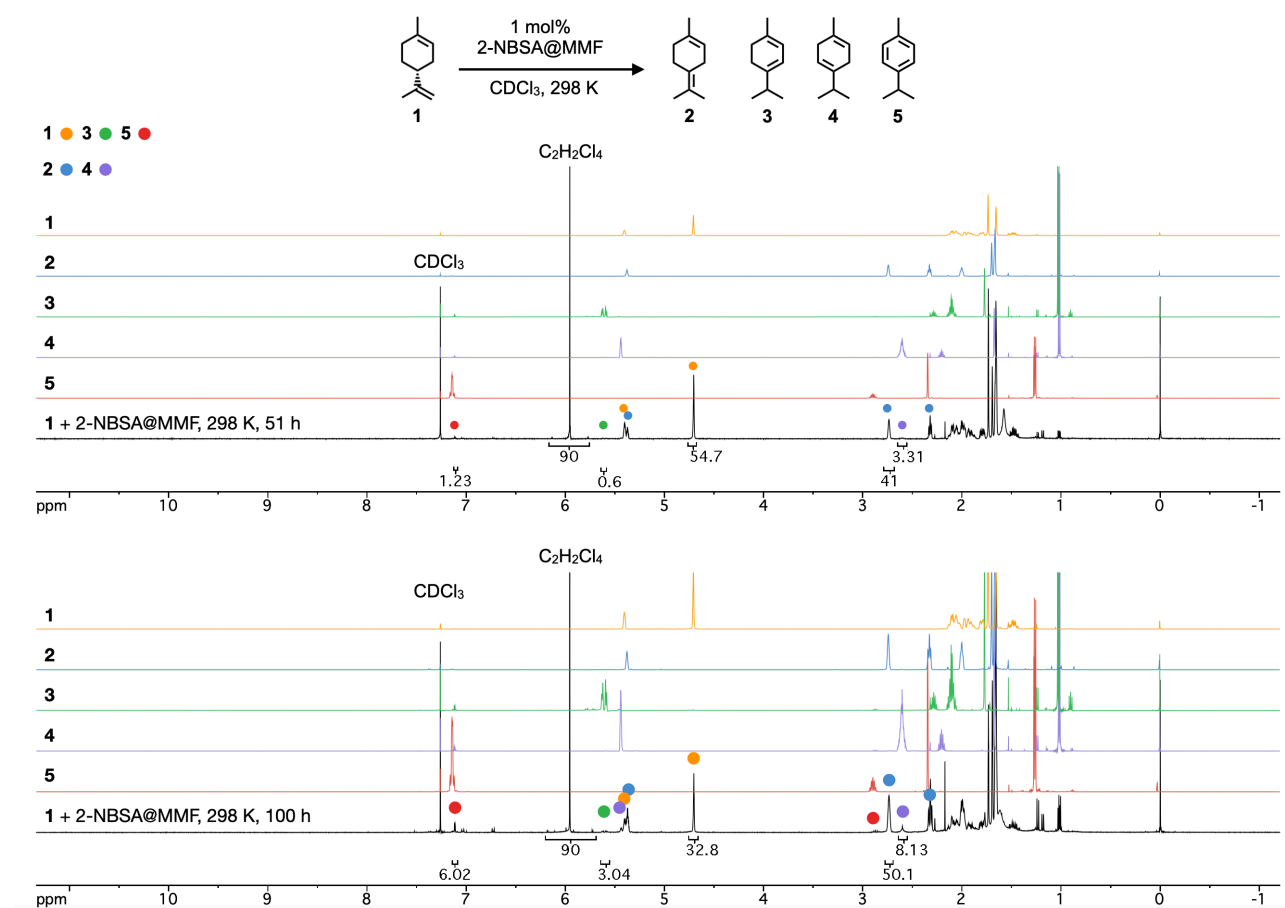

**Fig. S9**  $^1\text{H}$  NMR spectra (500 MHz,  $\text{CDCl}_3$ , 300 K) of **1**–**5** and the reaction mixtures of (+)-limonene (**1**) and 2-NBSA@MMF in  $\text{CDCl}_3$  at 298 K after 51 h (top) and 100 h (bottom).



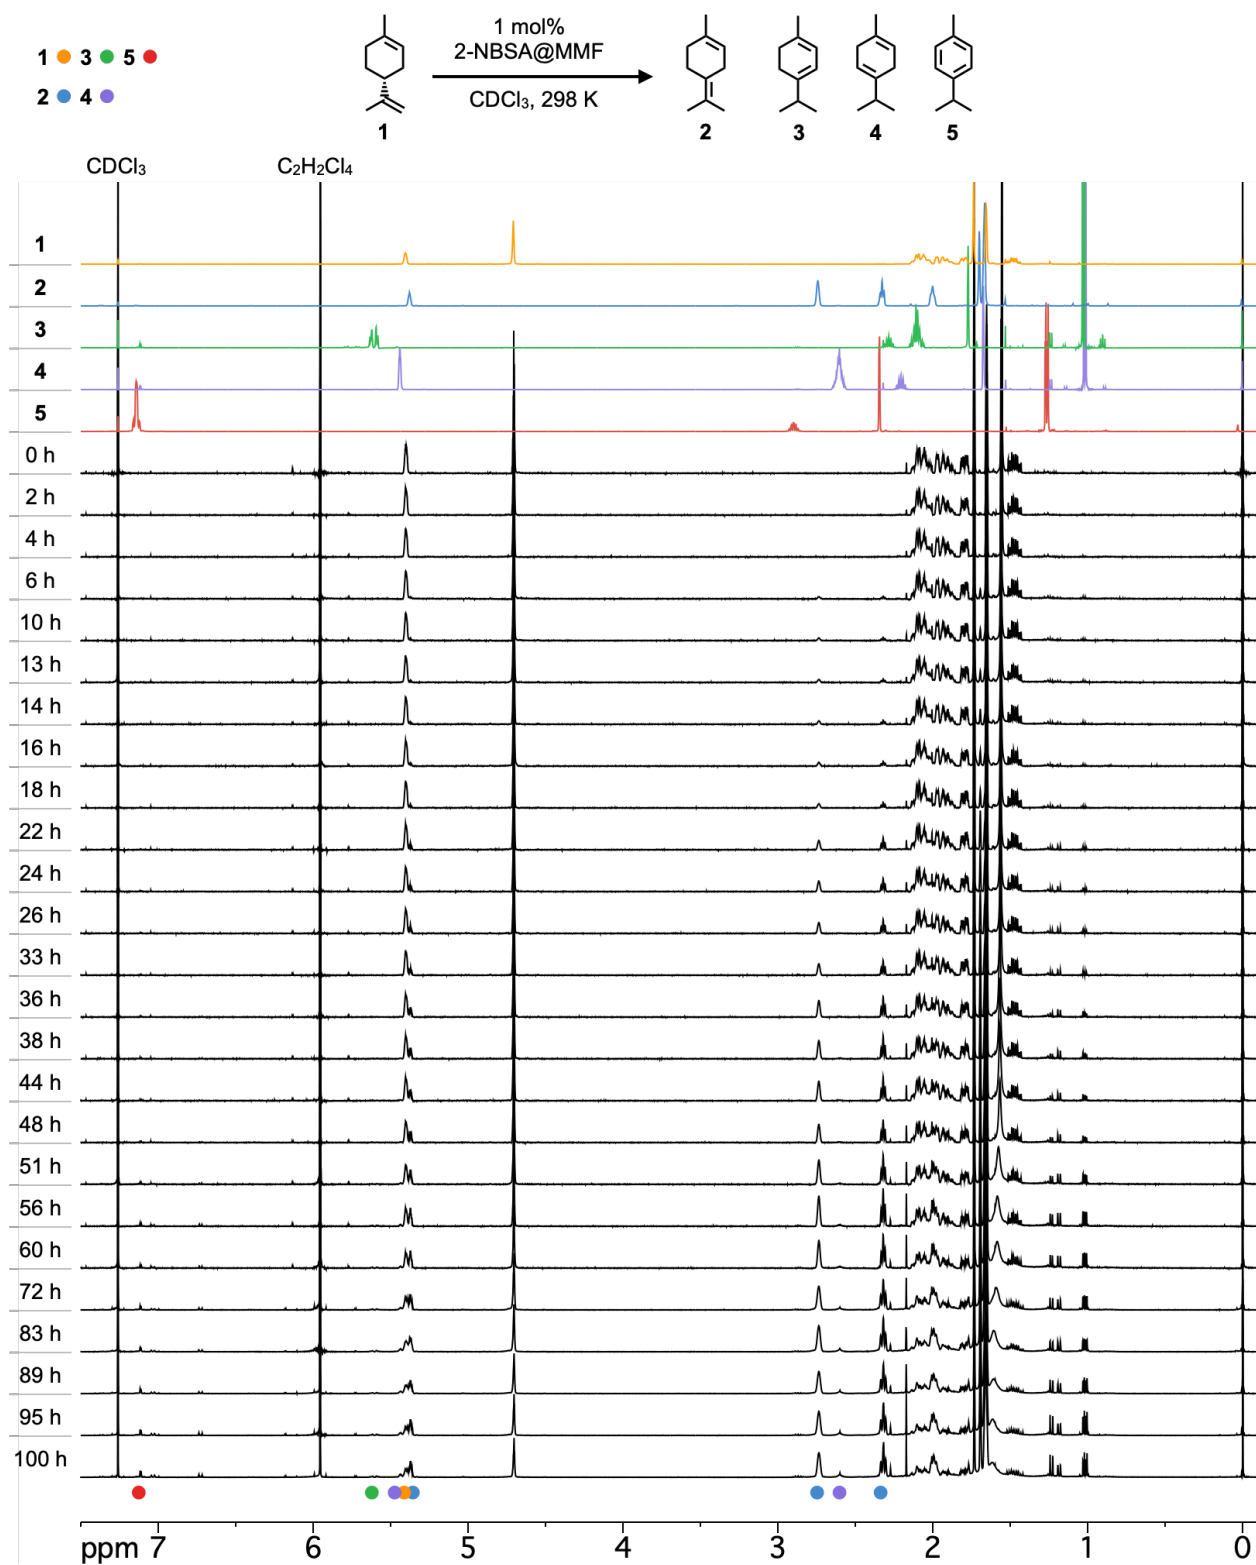

**Fig. S10** <sup>1</sup>H NMR spectra (500 MHz, CDCl<sub>3</sub>, 300 K) of 1–5 and the time-course analysis of the reaction mixture of (+)-limonene (1) and 2-NBSA@MMF in CDCl<sub>3</sub> at 298 K.

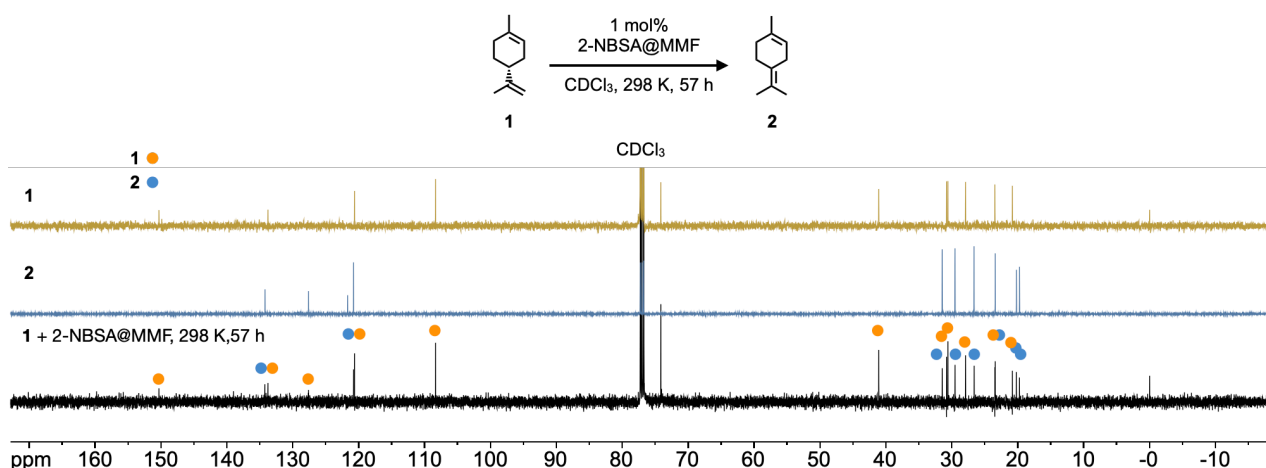

**Fig. S11**  $^{13}\text{C}$  NMR spectra (126 MHz,  $\text{CDCl}_3$ , 300 K) of **1**, **2**, and the reaction mixture of (+)-limonene (**1**) and 2-NBSA@MMF in  $\text{CDCl}_3$  at 298 K after 57 h.

To investigate the effect of catalyst amount on this reaction, the catalyst was increased to 3 mol% as follows. First, crystals of 2-NBSA@MMF (ca. 1.5 mg, 0.3  $\mu\text{mol}$  of 2-NBSA in MMF, 3 mol%) immediately after preparation and a  $\text{CDCl}_3$  solution of (+)-limonene (**1**) (10 mM, 1.0 mL, 10  $\mu\text{mol}$ ) were placed in an NMR tube. The heterogeneous mixture was shaken on a shaker at 298 K and the time course was monitored by  $^1\text{H}$  NMR measurements (500 MHz,  $\text{CDCl}_3$ , 300 K). The conversion ratios of (+)-limonene (**1**) and the yields of the main products were evaluated using 1,1,2,2-tetrachloroethane (9 mM, 1.0 mL, 9  $\mu\text{mol}$ ) as internal standard. When (+)-limonene (**1**) was treated with 2-NBSA@MMF, 85% of (+)-limonene (**1**) was consumed at 298 K after 100 h, and the formation of terpinolene (**2**) (41% yield, 48% selectivity),  $\alpha$ -terpinene (**3**) (2%),  $\gamma$ -terpinene (**4**) (6%), and *p*-cymene (**5**) (10%) was confirmed.

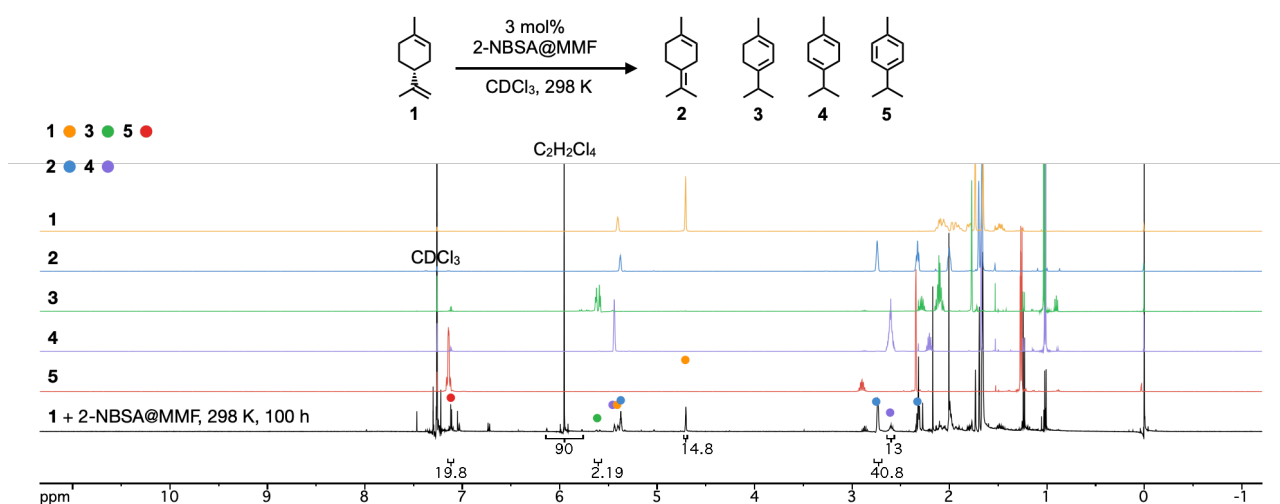

**Fig. S12**  $^1\text{H}$  NMR spectra (500 MHz,  $\text{CDCl}_3$ , 300 K) of **1–5** and the reaction mixtures of (+)-limonene (**1**) and 2-NBSA@MMF in  $\text{CDCl}_3$  at 298 K after 100 h.

### 3.2 Confirmation of heterogeneous properties of the 2-NBSA@MMF catalyst

Crystals of 2-NBSA@MMF (ca. 0.5 mg, 0.1  $\mu\text{mol}$  of 2-NBSA in MMF, 1 mol%) immediately after preparation and a  $\text{CDCl}_3$  solution of (+)-limonene (10 mM, 1.0 mL, 10  $\mu\text{mol}$ ) were placed in an NMR tube. 1,1,2,2-Tetrachloroethane (7.5 mM, 1.0 mL, 7.5  $\mu\text{mol}$ ) was used as internal standard to evaluate the conversion ratios of (+)-limonene (**1**) and the yields of the main products. This heterogeneous mixture was shaken on a shaker at 298 K for 36 h, and  $^1\text{H}$  NMR measurements revealed that 30% of **1** was converted to **2–5**.

Then, half of the supernatant was removed with a syringe and filtrated through a membrane filter unit. The supernatant and the rest of the suspension were placed separately under the same conditions. After 17 h,  $^1\text{H}$  NMR measurement showed that the conversion rate of the supernatant liquid had hardly increased (31%), while the conversion rate of the suspension had reached 46%.

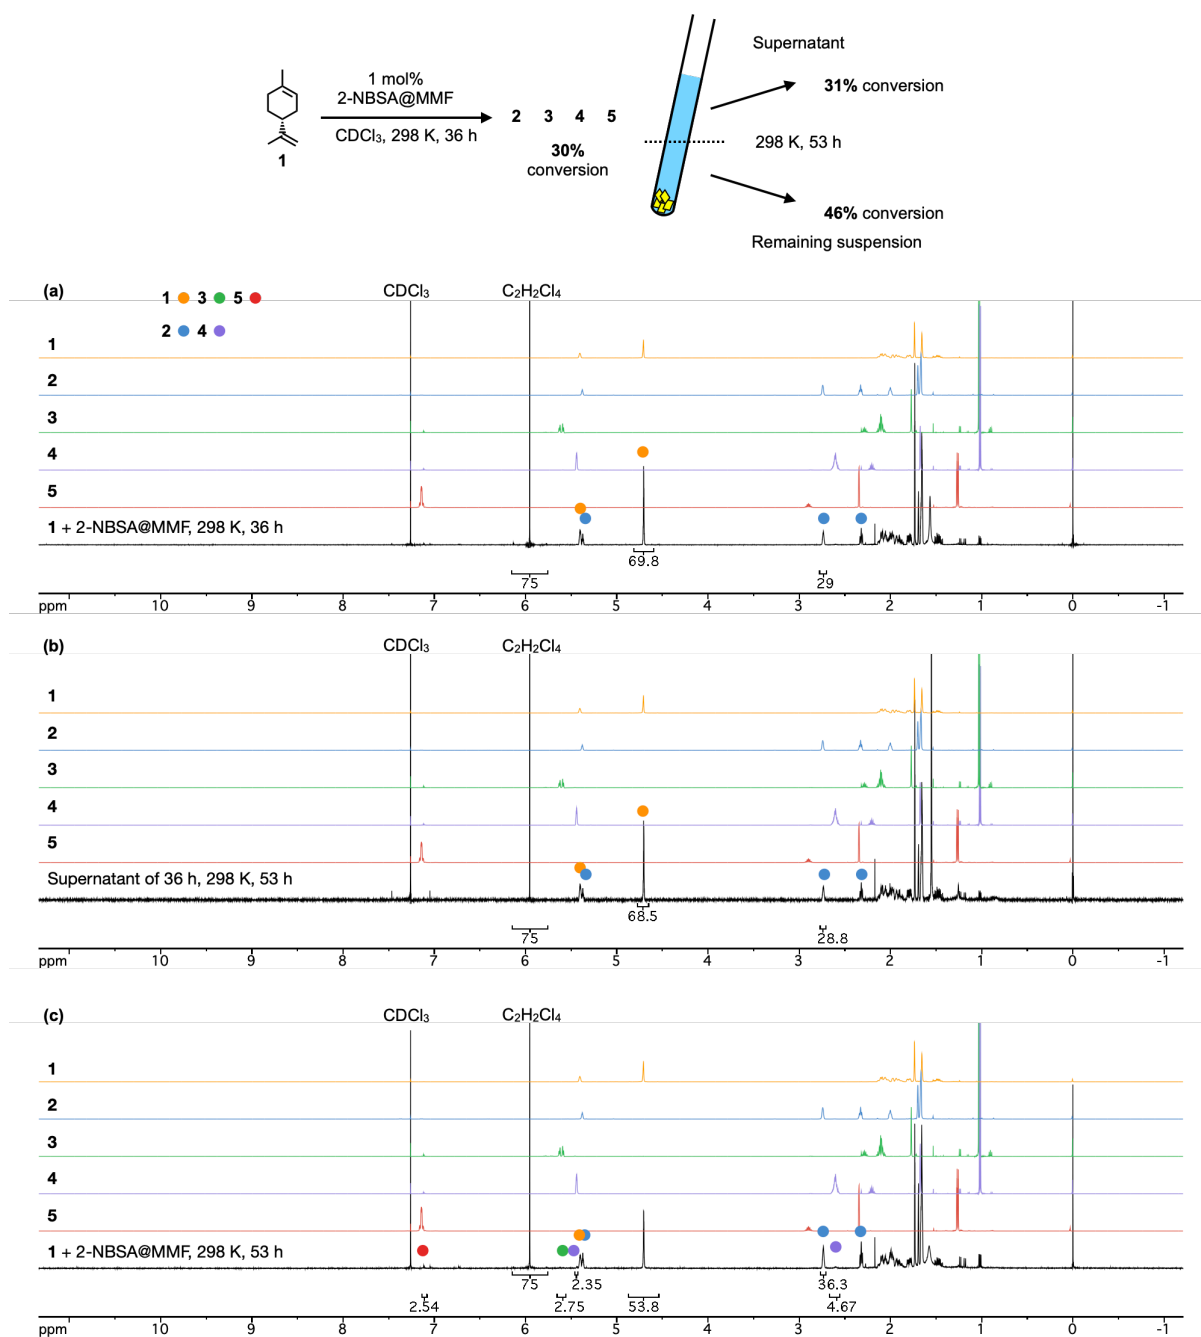

**Fig. S13**  $^1\text{H}$  NMR spectra (500 MHz,  $\text{CDCl}_3$ , 300 K) of **1–5**, and (a) the reaction mixture of **1** and 2-NBSA after 36 h; (b) the supernatant of the 36 h-reaction after 53 h; (c) the remaining suspension of the 36 h-reaction after 53 h.

### 3.3 Procedure for the isomerization of (+)-limonene using 2-NBSA·H<sub>2</sub>O

A  $\text{CDCl}_3$  solution of 2-NBSA·H<sub>2</sub>O (1 mM, 0.1 mL, 0.1  $\mu\text{mol}$ , 1 mol%) and a  $\text{CDCl}_3$  solution of (+)-limonene (**1**) (11 mM, 0.9 mL, 9.9  $\mu\text{mol}$ ) were set in an NMR tube. This mixture was shaken on a shaker at 298 K and the time course was monitored by  $^1\text{H}$  NMR measurements (500 MHz,  $\text{CDCl}_3$ , 300 K). 1,1,2,2-Tetrachloroethane (4.5 mM, 1.0 mL, 4.5  $\mu\text{mol}$ ) was used as an internal standard to evaluate the conversion ratio of (+)-limonene and the yield of main product. Treatment of (+)-limonene (**1**) with 2-NBSA·H<sub>2</sub>O at 298 K for 12 h resulted in 80% conversion of (+)-limonene (**1**) to terpinolene (**2**) (50% yield, 63% selectivity),  $\alpha$ -terpinene (**3**) (2.2%),  $\gamma$ -terpinene (**4**) (1.8%) and *p*-cymene (**5**) (7.5%). After extending the reaction to 100 h at 298 K, 98% of (+)-limonene (**1**) was converted to terpinolene (**2**) (9.8% yield, 10% selectivity),  $\alpha$ -terpinene (**3**) (5.8%),  $\gamma$ -terpinene (**4**) (8.0%) and *p*-cymene (**5**) (30%).

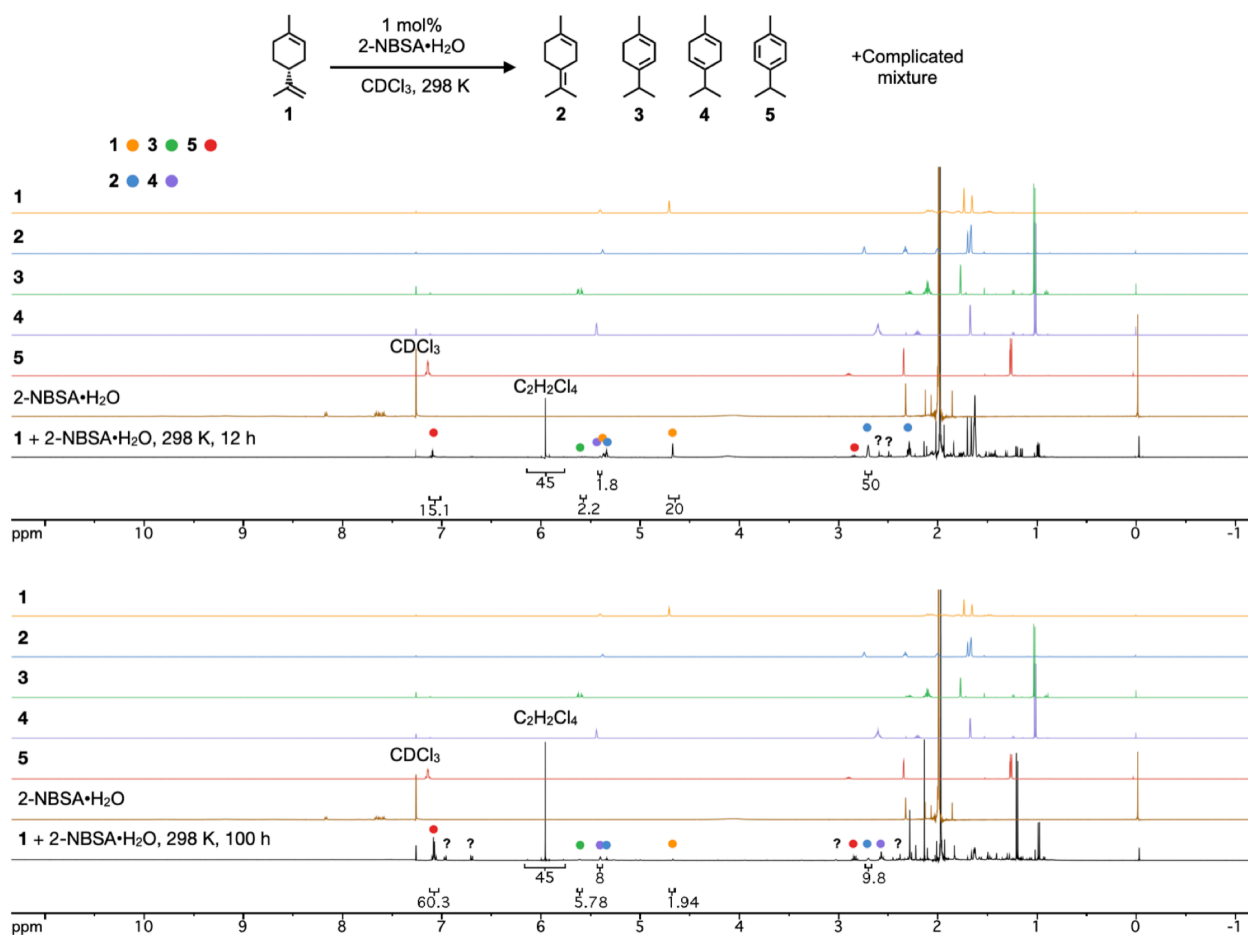

**Fig. S14**  $^1\text{H}$  NMR spectra (500 MHz,  $\text{CDCl}_3$ , 300 K) of **1–5** and the reaction mixture of (+)-limonene (**1**) and 2-NBSA·H<sub>2</sub>O in  $\text{CDCl}_3$  at 298 K after 12 h (top) and 100 h (bottom).

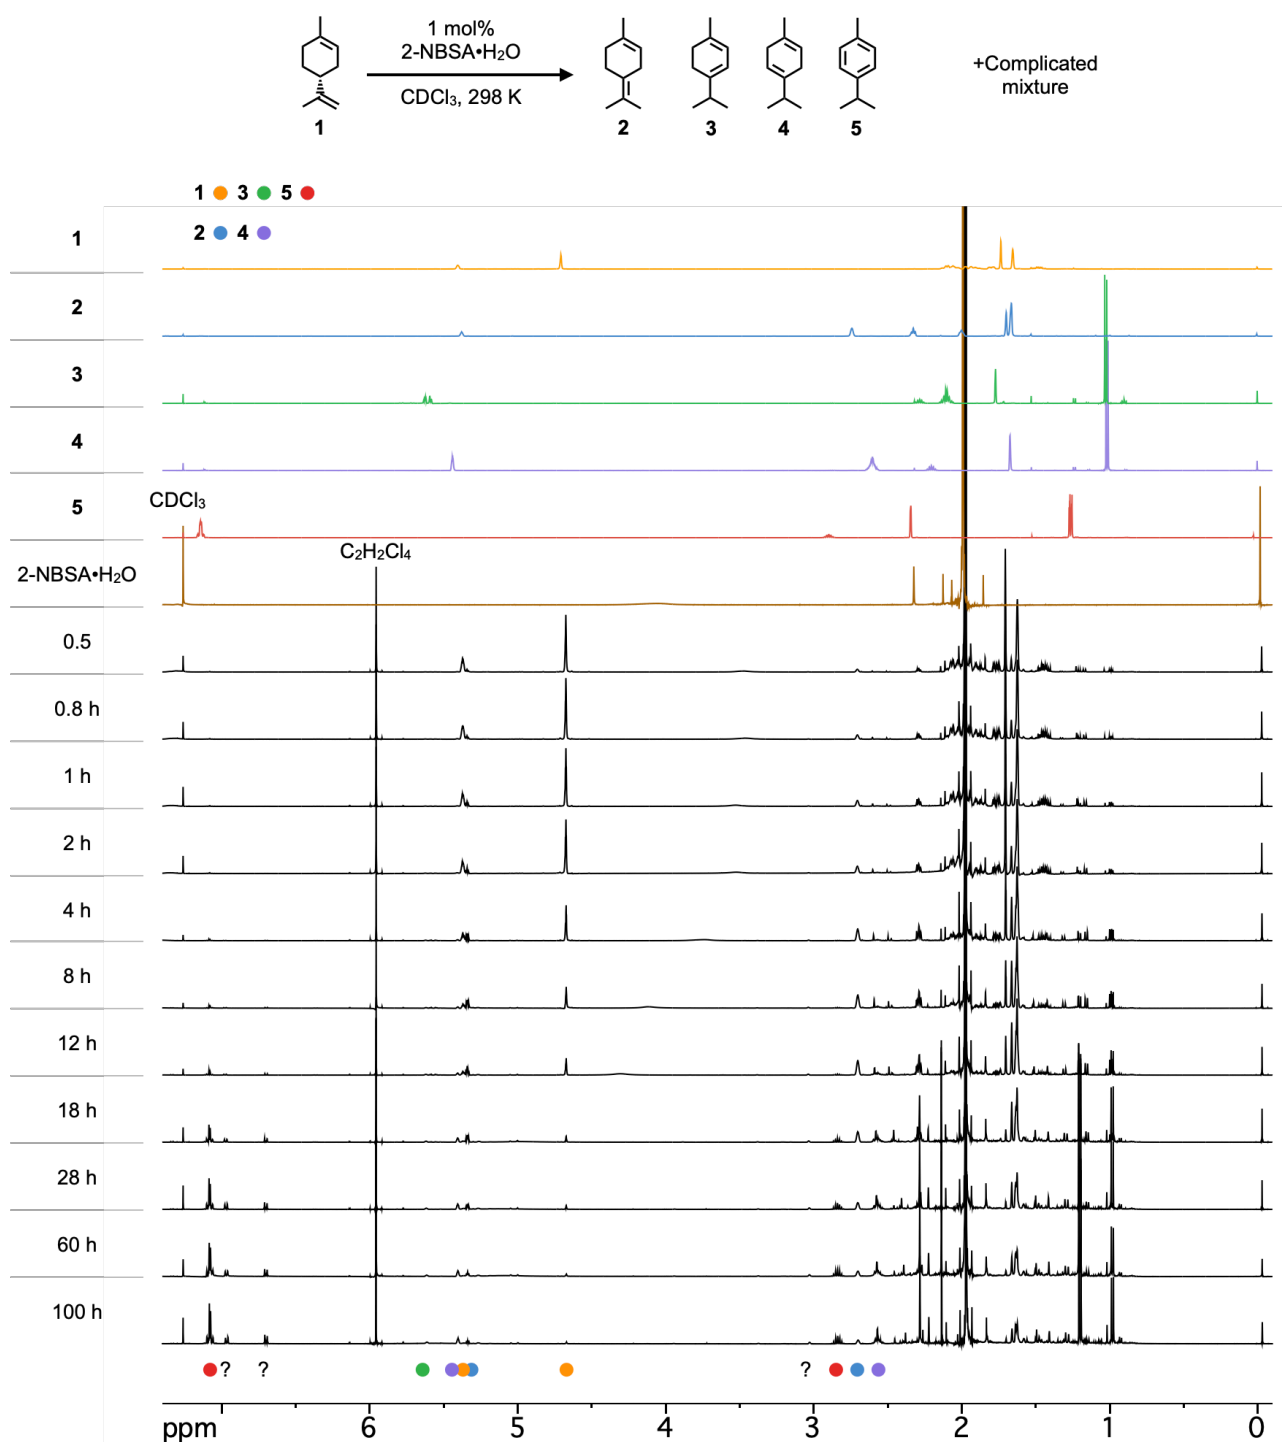

**Fig. S15** <sup>1</sup>H NMR spectra (500 MHz, CDCl<sub>3</sub>, 300 K) of 1–5, 2-NBSA·H<sub>2</sub>O, and the time-course analysis of the reaction mixture of (+)-limonene (1) and 2-NBSA·H<sub>2</sub>O in CDCl<sub>3</sub> at 298 K.

### 3.4 Reproducibility test of the catalytic reactions

Catalytic conversion of (+)-limonene (1) with 2-NBSA@MMF or 2-NBSA·H<sub>2</sub>O was repeated three times under the same condition to verify the reproducibility. The standard errors in Fig. 4d were estimated from these results.

(a) 2-NBSA@MMF

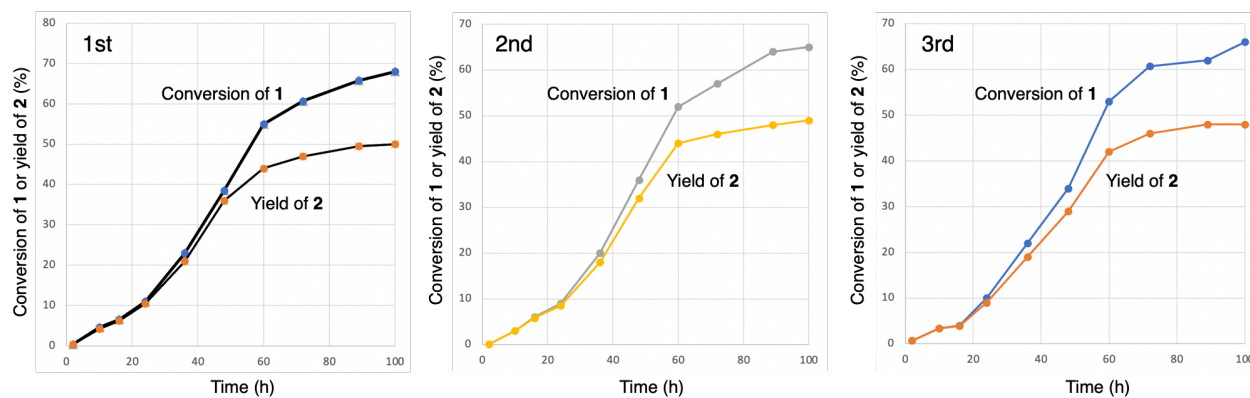

(b) 2-NBSA·H<sub>2</sub>O

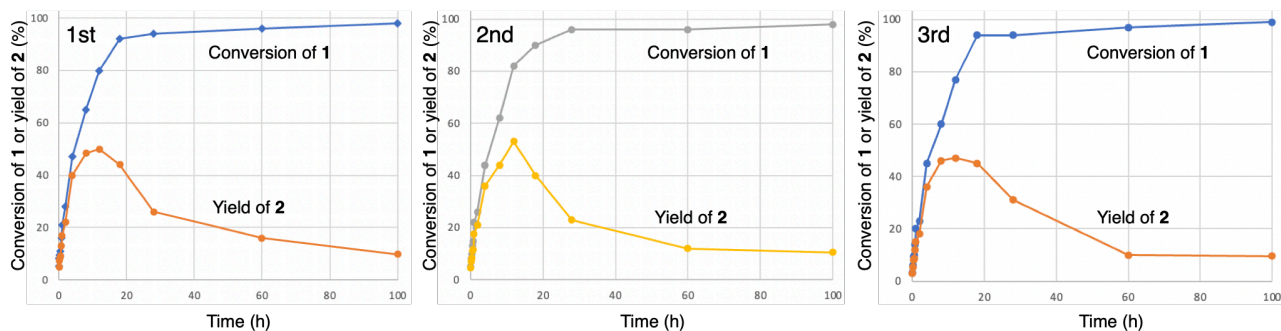

**Fig. S16** Time-course analysis of the isomerization reaction of **1** with 1 mol% of (a) 2-NBSA@MMF or (b) 2-NBSA·H<sub>2</sub>O in CDCl<sub>3</sub> at 298 K.

## 4. Examination of the inhibitory effects of additives on the over-isomerization

### 4.1 Inhibitory effects of (+)-limonene on the over-isomerization of terpinolene using 2-NBSA@MMF

To confirm the over-isomerization of terpinolene (**2**) using 2-NBSA@MMF, crystals of 2-NBSA@MMF (ca. 0.5 mg, 0.1  $\mu$ mol of 2-NBSA in MMF, 1 mol%) immediately after preparation and a CDCl<sub>3</sub> solution of terpinolene (**2**) (10 mM, 1.0 mL, 10  $\mu$ mol) were set in an NMR tube. This heterogeneous mixture was shaken on a shaker at 298 K and analyzed by <sup>1</sup>H NMR measurements (500 MHz, CDCl<sub>3</sub>, 300 K) after 102 h. The conversion ratios of terpinolene (**2**) was evaluated from the internal standard of 1,1,2,2-tetrachloroethane (9 mM, 1.0 mL, 9  $\mu$ mol). Terpinolene (**2**) was treated with 2-NBSA@MMF, 54% of terpinolene (**2**) was consumed and the formation of  $\alpha$ -terpinene (**3**) (5%),  $\gamma$ -terpinene (**4**) (11%), *p*-cymene (**5**) (14%) and limonene (8%) at 298 K for 102 h.

Then, to examine the inhibitory effects of (+)-limonene (**1**) on over-isomerization, 30 mol%, 100 mol%, or 300 mol% of (+)-limonene (**1**) (3  $\mu$ mol, 10  $\mu$ mol, or 30  $\mu$ mol, respectively, based on terpinolene) were added to the reaction mixture before shaking at 298 K for 102 h. The conversion of terpinolene (**2**) to  $\alpha$ -terpinene (**3**),  $\gamma$ -terpinene (**4**) and *p*-cymene (**5**) decreased to 47%, 37% and 16%, respectively.

**Tab. S1** Inhibitory effects of (+)-limonene (**1**) on over-isomerization of terpinolene (**2**).

| Additives         | Concentration (mM)         |                            |                              |                              | Conversion ( <b>2</b> ) <sup>a</sup> |
|-------------------|----------------------------|----------------------------|------------------------------|------------------------------|--------------------------------------|
|                   | [ <b>1</b> ] <sub>0h</sub> | [ <b>2</b> ] <sub>0h</sub> | [ <b>1</b> ] <sub>102h</sub> | [ <b>2</b> ] <sub>102h</sub> |                                      |
| 30 mol% <b>1</b>  | 3                          | 10                         | 1.8                          | 6.5                          | 47%                                  |
| 100 mol% <b>1</b> | 10                         | 10                         | 5.0                          | 11.3                         | 37%                                  |
| 300 mol% <b>1</b> | 30                         | 10                         | 12.1                         | 26.3                         | 16%                                  |

<sup>a</sup> Considering that additive **1** selectively converted to **2**, the conversion rate of **2** was calculated as follows, where ( $[**1**]<sub>0h</sub> - [**1**]<sub>102h</sub>)$  represents the change in concentration of **1** after 102 h.

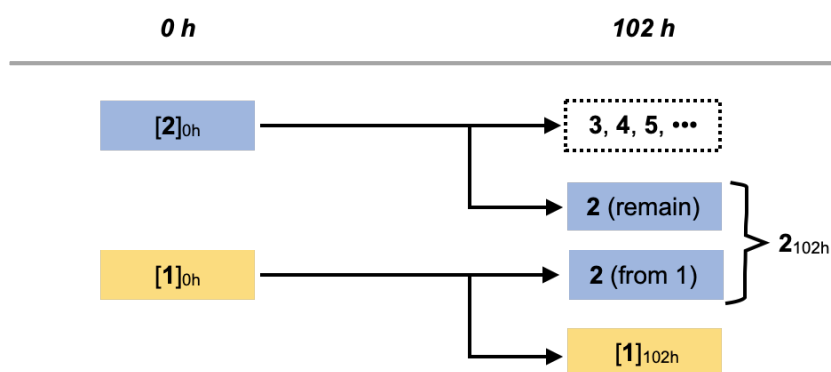

$$\text{Conversion (**2**)} = \frac{[**2**]<sub>0h</sub> - [**2**]<sub>\text{remain}}</sub>$$

$$= \frac{[**2**]<sub>0h</sub> - \{[**2**]<sub>102h</sub> - ([**1**]<sub>0h</sub> - [**1**]<sub>102h</sub>)\}}{[**2**]<sub>0h}}</sub>$$

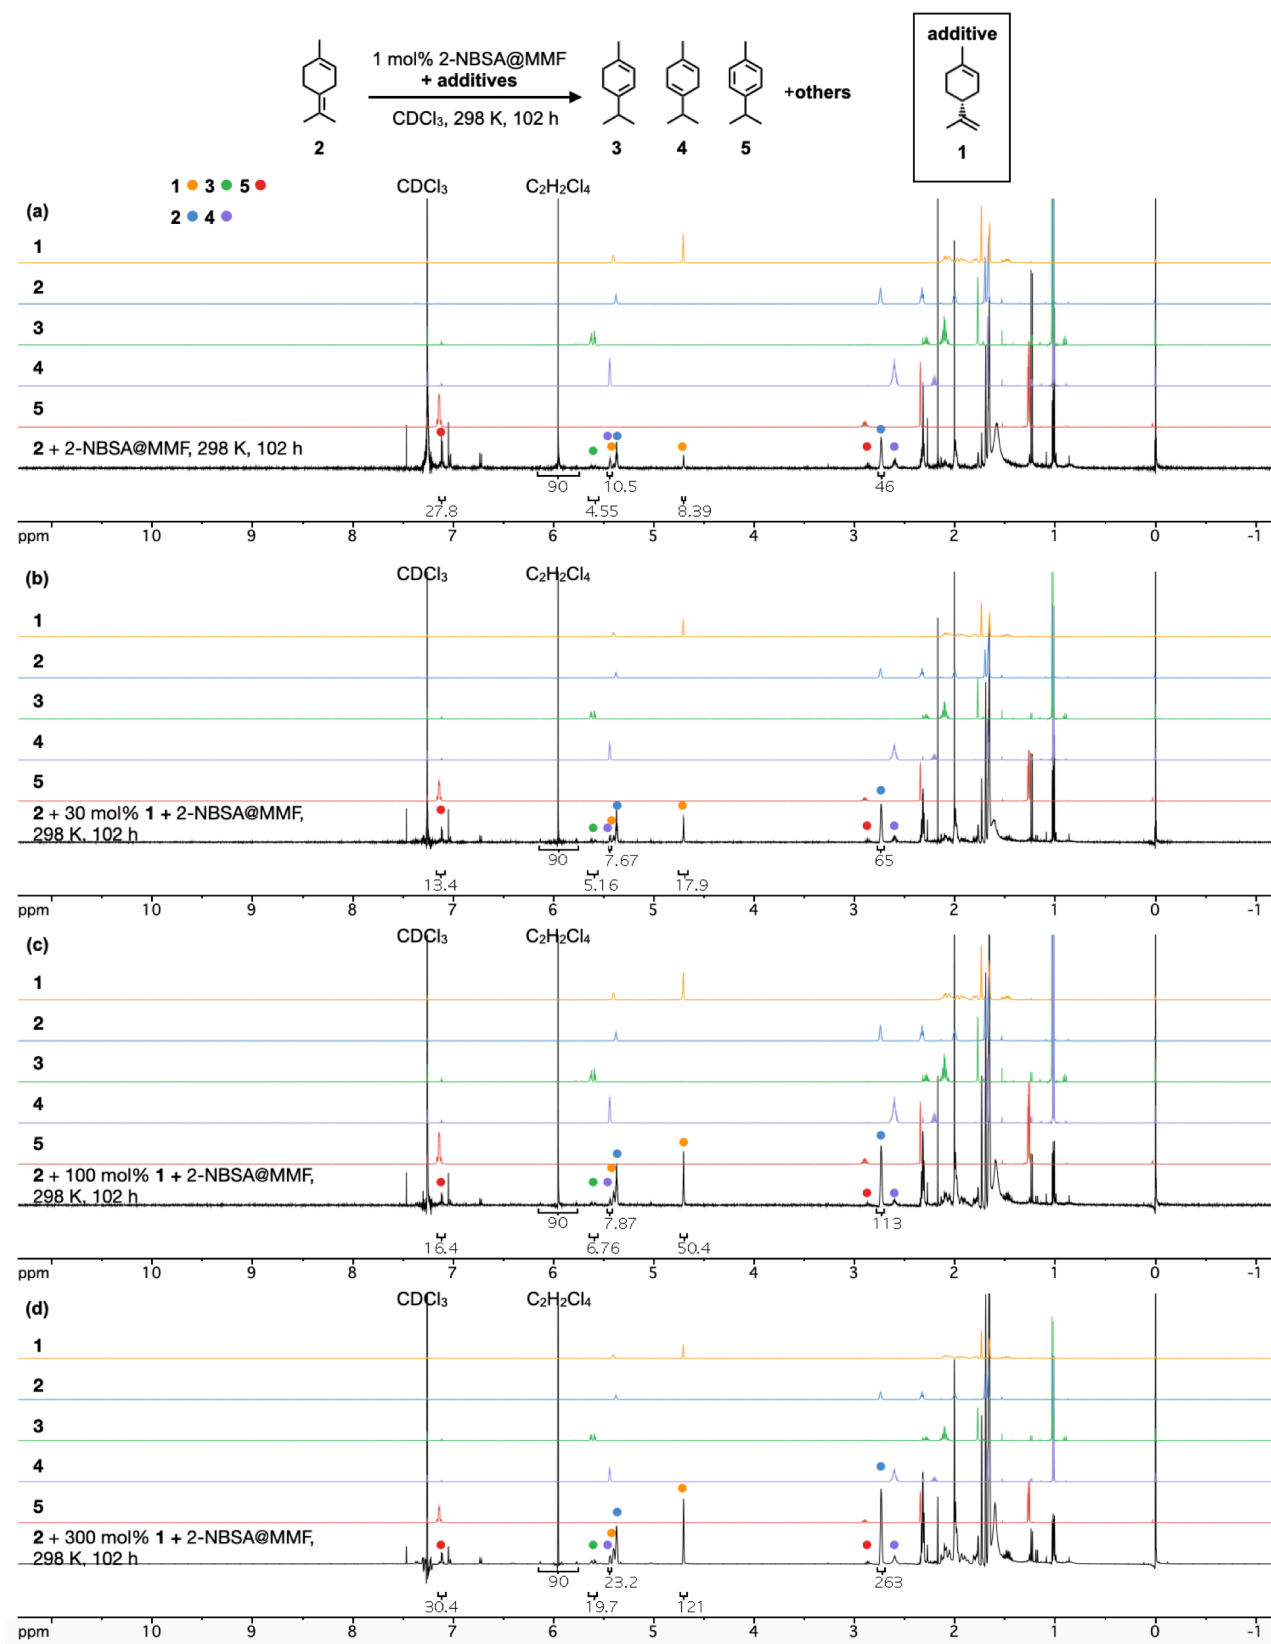

**Fig. S17**  $^1\text{H}$  NMR spectra (500 MHz,  $\text{CDCl}_3$ , 300 K) of **1–5**, and (a) the reaction mixture of **2** and 2-NBSA@MMF; (b) the reaction mixture of **2** + 30 mol% of **1** and 2-NBSA@MMF; (c) the reaction mixture of **2** + 100 mol% of **1** and 2-NBSA@MMF; (d) the reaction mixture of **2** + 300 mol% of **1** and 2-NBSA@MMF in  $\text{CDCl}_3$  at 298 K after 102 h.



## 4.2 Inhibitory effects of (-)- $\alpha$ -pinene, (-)- $\beta$ -pinene, benzene, and 1,2-dibromobenzene on the over-isomerization of terpinolene using 2-NBSA@MMF

Crystals of 2-NBSA@MMF (ca. 0.5 mg, 0.1  $\mu$ mol of 2-NBSA in MMF, 1 mol%) immediately after preparation, a  $\text{CDCl}_3$  solution of terpinolene (**2**) (10 mM, 1.0 mL, 10  $\mu$ mol), and additives such as (-)- $\alpha$ -pinene (**6**) (15  $\mu$ mol, 150 mol% relative to **2**), (-)- $\beta$ -pinene (**7**) (15  $\mu$ mol, 150 mol% relative to **2**), benzene (**8**) (19  $\mu$ mol, 190 mol% relative to **2**) or 1,2-dibromobenzene (**9**) (19  $\mu$ mol, 190 mol% relative to **2**) were set in an NMR tube. These heterogeneous mixtures were shaken on a shaker at 298 K and analyzed by  $^1\text{H}$  NMR measurements (500 MHz,  $\text{CDCl}_3$ , 300 K) after 102 h. The conversion ratios of terpinolene (**2**) were evaluated from the internal standard of 1,1,2,2-tetrachloroethane (12 mM, 1.0 mL, 12  $\mu$ mol). As a result, the conversion of terpinolene (**2**) to  $\alpha$ -terpinene (**3**),  $\gamma$ -terpinene (**4**) and *p*-cymene (**5**) decreased to 0%, 0%, 87% and 55%, respectively, at 298 K after 102 h.

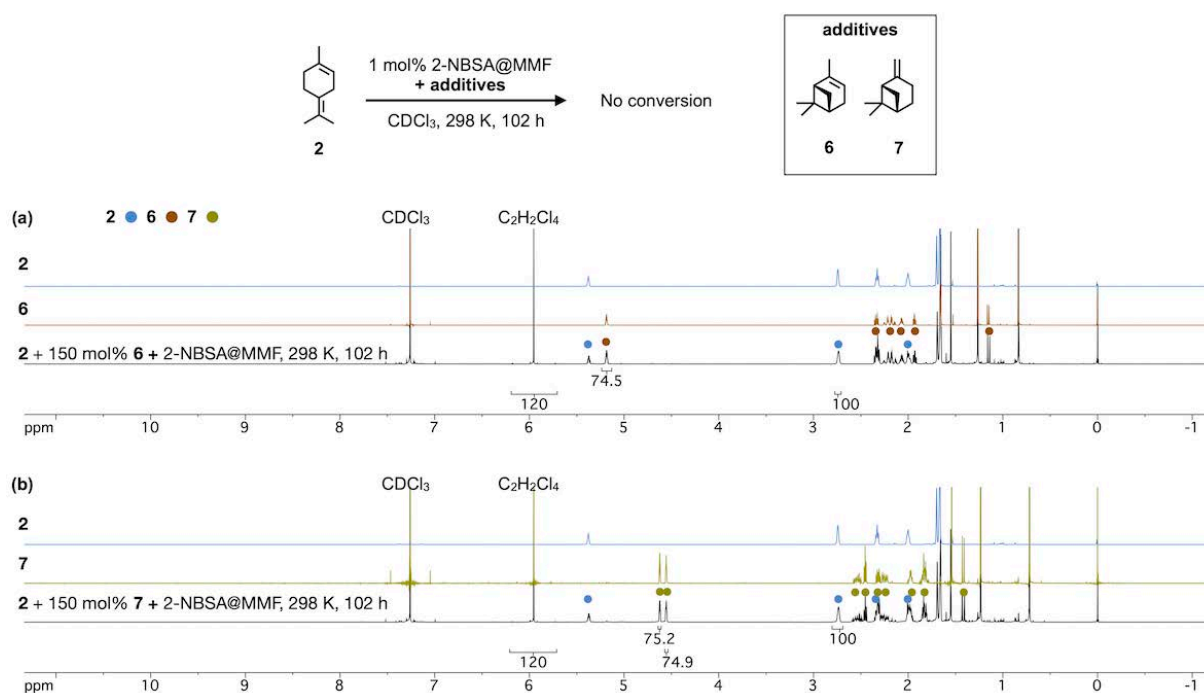

**Fig. S18**  $^1\text{H}$  NMR spectra (500 MHz,  $\text{CDCl}_3$ , 300 K) of (a) **2**, **6**, and the reaction mixture of **2** + 150 mol% of **6** and 2-NBSA@MMF in  $\text{CDCl}_3$  at 298 K after 102 h; (b) **2**, **7** and the reaction mixture of **2** + 150 mol% of **7** and 2-NBSA@MMF in  $\text{CDCl}_3$  at 298 K after 102 h.

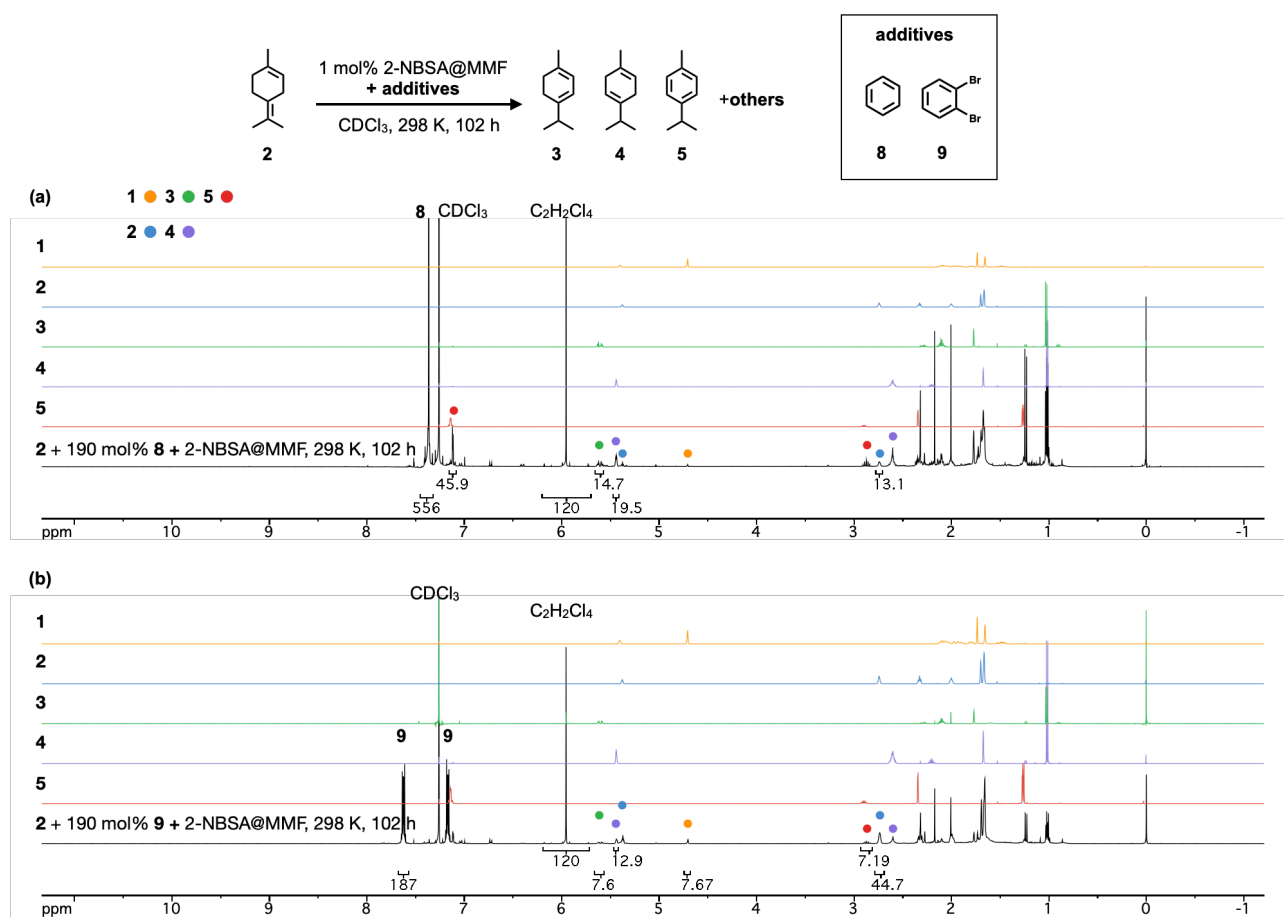

**Fig. S19**  $^1\text{H}$  NMR spectra (500 MHz,  $\text{CDCl}_3$ , 300 K) of 1–5, and (a) the reaction mixture of 2 + 190 mol% of 8 in  $\text{CDCl}_3$  at 298 K after 102 h; (b) the reaction mixture of 2 + 190 mol% of 9 and 2-NBSA@MMF in  $\text{CDCl}_3$  at 298 K after 102 h.

### 4.3 Isomerization of terpinolene using 2-NBSA·H<sub>2</sub>O

A  $\text{CDCl}_3$  solution of 2-NBSA·H<sub>2</sub>O (1 mM, 0.1 mL, 0.1  $\mu\text{mol}$ , 1 mol%) and a  $\text{CDCl}_3$  solution of terpinolene (2) (11 mM, 0.9 mL, 9.9  $\mu\text{mol}$ ) were set in an NMR tube. This mixture was shaken on a shaker at 298 K and the time course of the reaction was monitored by  $^1\text{H}$  NMR measurements (500 MHz,  $\text{CDCl}_3$ , 300 K). Using 1,1,2,2-tetrachloroethane (4.5 mM, 1.0 mL, 4.5  $\mu\text{mol}$ ) as an internal standard, the conversion ratios of terpinolene (2) and the yields of main products were evaluated. Treatment of terpinolene (2) with 2-NBSA·H<sub>2</sub>O at 298 K for 102 h resulted in consumption of 68% of 2 to  $\alpha$ -terpinene (3) (4%),  $\gamma$ -terpinene (4) (12%), *p*-cymene (5) (20%) and limonene (7%).

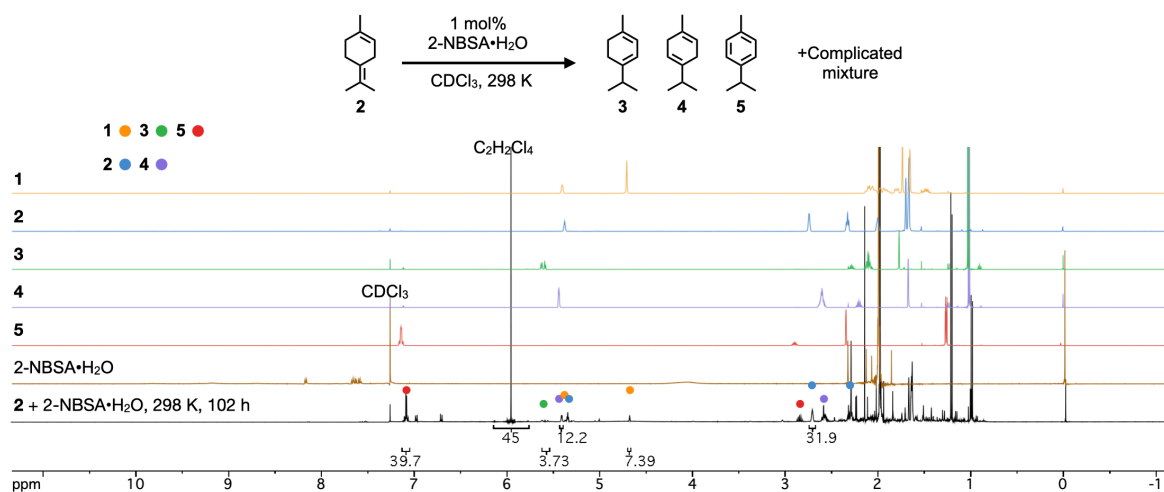

**Fig. S20**  $^1\text{H}$  NMR spectra (500 MHz,  $\text{CDCl}_3$ , 300 K) of **1–5** and the reaction mixture of terpinolene (**2**) and 2-NBSA· $\text{H}_2\text{O}$  in  $\text{CDCl}_3$  at 298 K after 102 h.

## 5. Crystal structures of MMF soaked in a solution of terpenes

### 5.1 Crystal structure of (+)-limonene@MMF

MMF crystals (ca. 0.5 mg) were soaked in a  $\text{CHCl}_3$  solution of (+)-limonene (**1**) (1.0 M, 100  $\mu\text{L}$ , 100  $\mu\text{mol}$ ) at 298 K for 24 h in a capped microtube. One MMF crystal was then picked up and immediately mixed with paratone oil and single-crystal XRD was measured at 93 K.

#### Crystal data for (+)-limonene@MMF

Crystal data for  $(\text{Pd}_3\text{LCl}_6)_4 \cdot ((+)\text{-limonene})_{0.6} \cdot (\text{H}_2\text{O})_{4.5}$ :  $\text{C}_{174}\text{H}_{177.6}\text{Cl}_{24}\text{N}_{24}\text{O}_{4.5}\text{Pd}_{12}$ ,  $F_w = 4804.03$ , crystal dimensions  $0.08 \times 0.10 \times 0.11 \text{ mm}^3$ , monoclinic, space group  $P2_1$ ,  $a = 14.2647(1)$ ,  $b = 52.2312(10)$ ,  $c = 19.5113(3) \text{ \AA}$ ,  $\beta = 91.295(1)^\circ$ ,  $V = 14533.4(4) \text{ \AA}^3$ ,  $Z = 2$ ,  $\rho_{\text{calcd}} = 1.098 \text{ g cm}^{-3}$ ,  $\mu = 8.17 \text{ mm}^{-1}$ ,  $T = 93 \text{ K}$ ,  $\lambda(\text{CuK}\alpha) = 1.54187 \text{ \AA}$ ,  $2\theta_{\text{max}} = 147.3^\circ$ , 160911/56440 reflections collected/unique ( $R_{\text{int}} = 0.0658$ ),  $R_1 = 0.1006$  ( $I > 2\sigma(I)$ ),  $wR_2 = 0.3087$  (for all data), GOF = 1.095, largest diff. peak and hole  $3.340/-1.950 \text{ e\AA}^{-3}$ , Flack parameter =  $0.245(15)$ , Hooft parameter =  $-0.061(8)$ . CCDC deposit number 2133386. Several restraints were applied to the MMF and the guest molecules to prevent the structure from collapsing during the least-squares refinement. The structure was refined as an inversion twin.

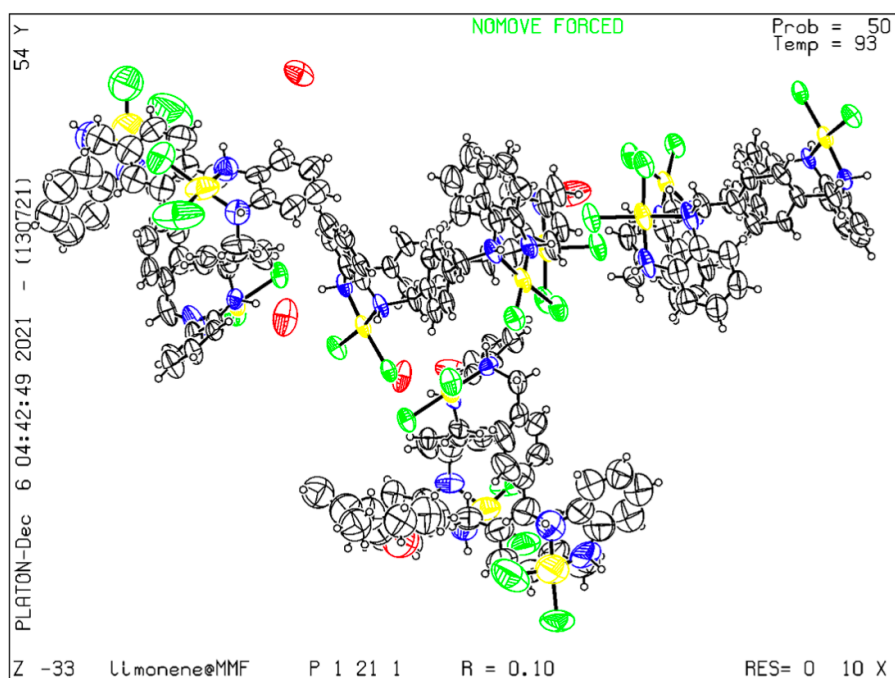

**Fig. S21** ORTEP drawing of (+)-limonene@MMF at the 50% probability level. Color: C black, N blue, O red, Cl green and Pd yellow.

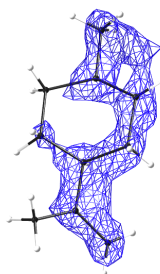

**Fig. S22** Electron density maps of (+)-limonene in the crystal structure of (+)-limonene@MMF (contour level:  $1.20 \text{ e}^-/\text{\AA}^3$ ).

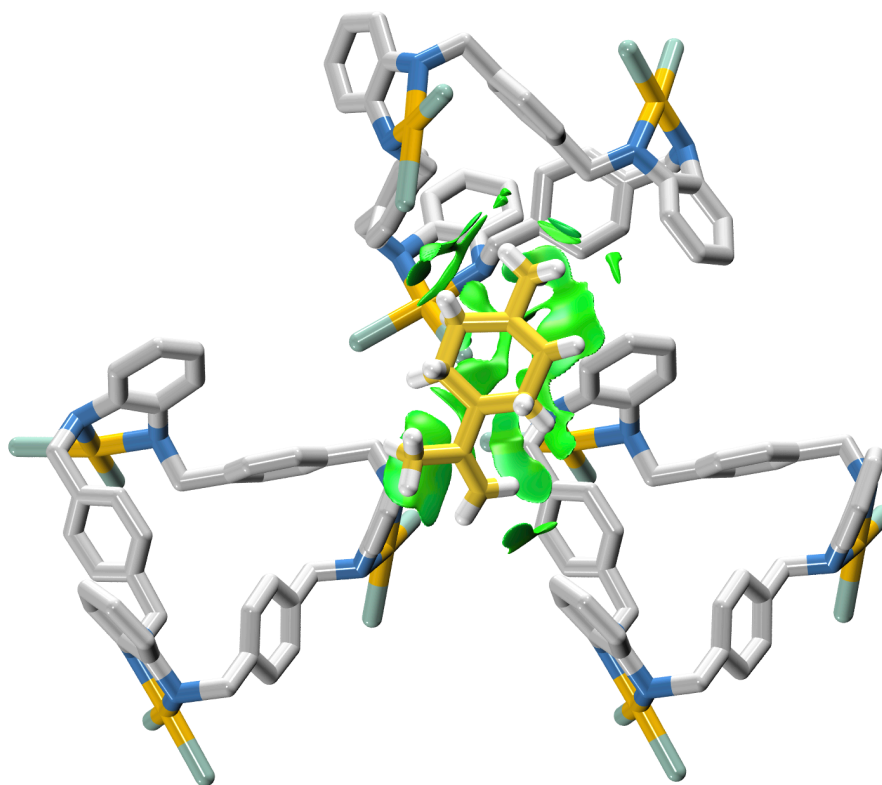

**Fig. S23** Plot of noncovalent interactions between (+)-limonene (**1**) and three adjacent macrocycles. Noncovalent interactions: green surface ( $s = 0.5$  a.u.,  $\rho < 0.05$  a.u.). Macrocycles and (+)-limonene: sticks model. MMF: Pd, yellow; Cl, green; N, blue; C, grey. **1**: C, yellow; H, white. Hydrogen atoms attached to macrocycles were omitted for clarity.

## 5.2 Crystal structure of terpinolene@MMF

MMF crystals (ca. 0.5 mg) were soaked in a  $\text{CHCl}_3$  solution of terpinolene (**2**) (1.0 M, 100  $\mu\text{L}$ , 100  $\mu\text{mol}$ ) at 298 K for 24 h in a capped micro-tube. One MMF crystal was then picked up and immediately mixed with paratone oil and single-crystal XRD was measured at 93 K.

### Crystal data for terpinolene@MMF

Crystal data for  $(\text{Pd}_3\text{LCl}_6)_2 \cdot (\text{CH}_3\text{CN}) \cdot (\text{CHCl}_3)_{3.3} \cdot (\text{H}_2\text{O})_2$ :  $\text{C}_{89.3}\text{H}_{90.3}\text{Cl}_{21.8}\text{N}_{13}\text{O}_2\text{Pd}_6$ ,  $F_w = 2786.43$ , crystal dimensions  $0.10 \times 0.10 \times 0.20$   $\text{mm}^3$ , monoclinic, space group  $P2_1/c$ ,  $a = 19.4857(2)$ ,  $b = 51.8380(7)$ ,  $c = 14.3167(1)$   $\text{\AA}$ ,  $\beta = 90.706(1)^\circ$ ,  $V = 14460.2(3)$   $\text{\AA}^3$ ,  $Z = 4$ ,  $\rho_{\text{calcd}} = 1.280$   $\text{g cm}^{-3}$ ,  $\mu = 9.90$   $\text{mm}^{-1}$ ,  $T = 93$  K,  $\lambda(\text{CuK}\alpha) = 1.54187$   $\text{\AA}$ ,  $2\theta_{\text{max}} = 146.8^\circ$ , 175959/28222 reflections collected/unique ( $R_{\text{int}} = 0.0971$ ),  $R_1 = 0.1322$  ( $I > 2\sigma(I)$ ),  $wR_2 = 0.3637$  (for all data), GOF = 1.084, largest diff. peak and hole 3.140/−1.950  $\text{e}\text{\AA}^{-3}$ . CCDC deposit number 2133390. Several restraints were applied to the MMF and the guest molecules to prevent the structure from collapsing during the least-squares refinement.

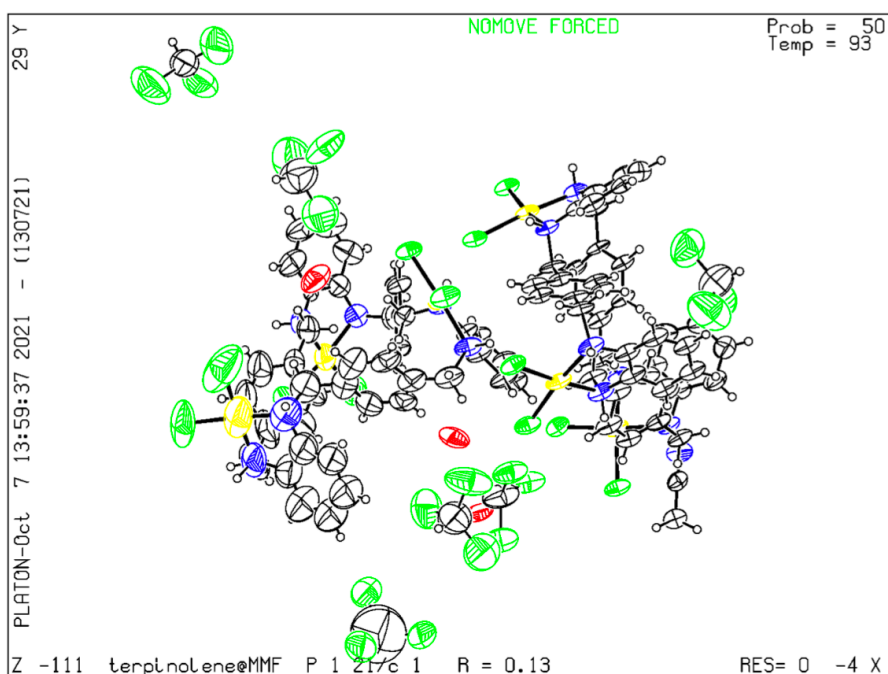

**Fig. S24** ORTEP drawing of terpinolene@MMF at the 50% probability level. Color: C black, N blue, O red, Cl green and Pd yellow.

### 5.3 Crystal structure of (–)-β-pinene@MMF

MMF crystals (ca. 0.5 mg) were soaked in a CH<sub>3</sub>CN solution of (–)-β-pinene (**7**) (1.0 M, 100 μL, 100 μmol) at 298 K for 24 h in a capped micro-tube. One MMF crystal was then picked up and immediately mixed with paratone oil and single-crystal XRD was measured at 93 K.

#### Crystal data for (–)-β-pinene @MMF

Crystal data for (Pd<sub>3</sub>LCl<sub>6</sub>)<sub>4</sub>·((–)-β-pinene)<sub>0.91</sub>·(CH<sub>3</sub>CN)·(H<sub>2</sub>O)<sub>2</sub>: C<sub>179.1</sub>H<sub>185.6</sub>Cl<sub>24</sub>N<sub>25</sub>O<sub>2</sub>Pd<sub>12</sub>,  $F_w = 4847.88$ , crystal dimensions 0.01 × 0.02 × 0.05 mm<sup>3</sup>, monoclinic, space group  $P2_1$ ,  $a = 14.3205(1)$ ,  $b = 50.1973(12)$ ,  $c = 19.4935(3)$  Å,  $\beta = 91.679(1)^\circ$ ,  $V = 14006.9(4)$  Å<sup>3</sup>,  $Z = 2$ ,  $\rho_{\text{calcd}} = 1.149$  g cm<sup>-3</sup>,  $\mu = 8.47$  mm<sup>-1</sup>,  $T = 93$  K,  $\lambda(\text{CuK}\alpha) = 1.54187$  Å,  $2\theta_{\text{max}} = 145.1^\circ$ , 147264/53297 reflections collected/unique ( $R_{\text{int}} = 0.0849$ ),  $R_1 = 0.1752$  ( $I > 2\sigma(I)$ ),  $wR_2 = 0.4764$  (for all data), GOF = 1.795, largest diff. peak and hole 4.250/–3.050 eÅ<sup>-3</sup>, Flack parameter = 0.23(3), Hooft parameter = –0.048(8). CCDC deposit number 2133389. Several restraints were applied to the MMF and the guest molecules to prevent the structure from collapsing during the least-squares refinement. The structure was refined as an inversion twin.

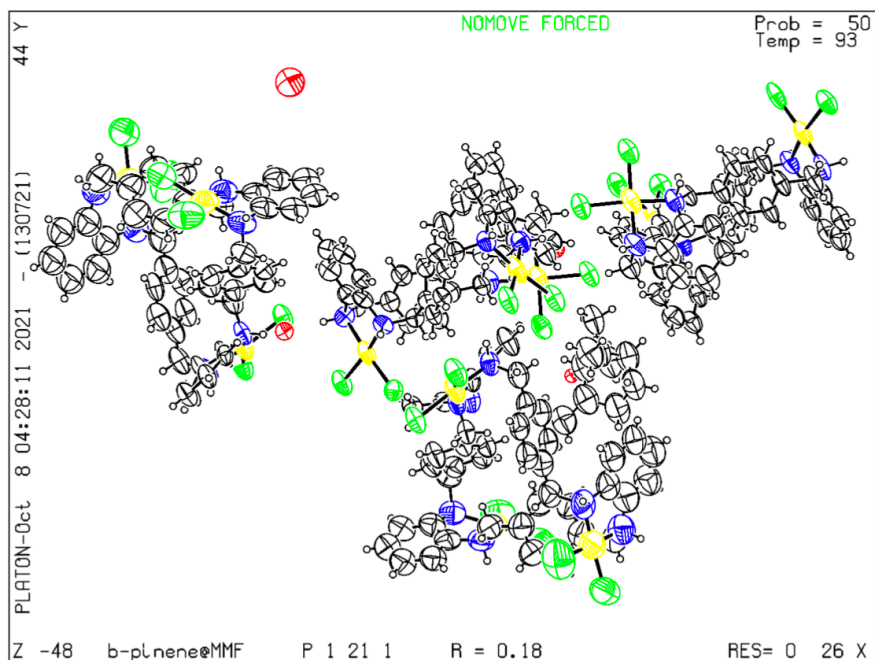

**Fig. S25** ORTEP drawing of (-)- $\beta$ -pinene@MMF at the 50% probability level. Color: C black, N blue, O red, Cl green and Pd yellow.

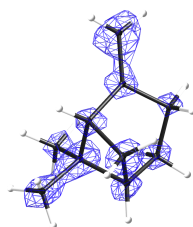

**Fig. S26** Electron density maps of (-)- $\beta$ -pinene in the crystal structure of (-)- $\beta$ -pinene@MMF (contour level:  $1.80 \text{ e}^-/\text{\AA}^3$ ).

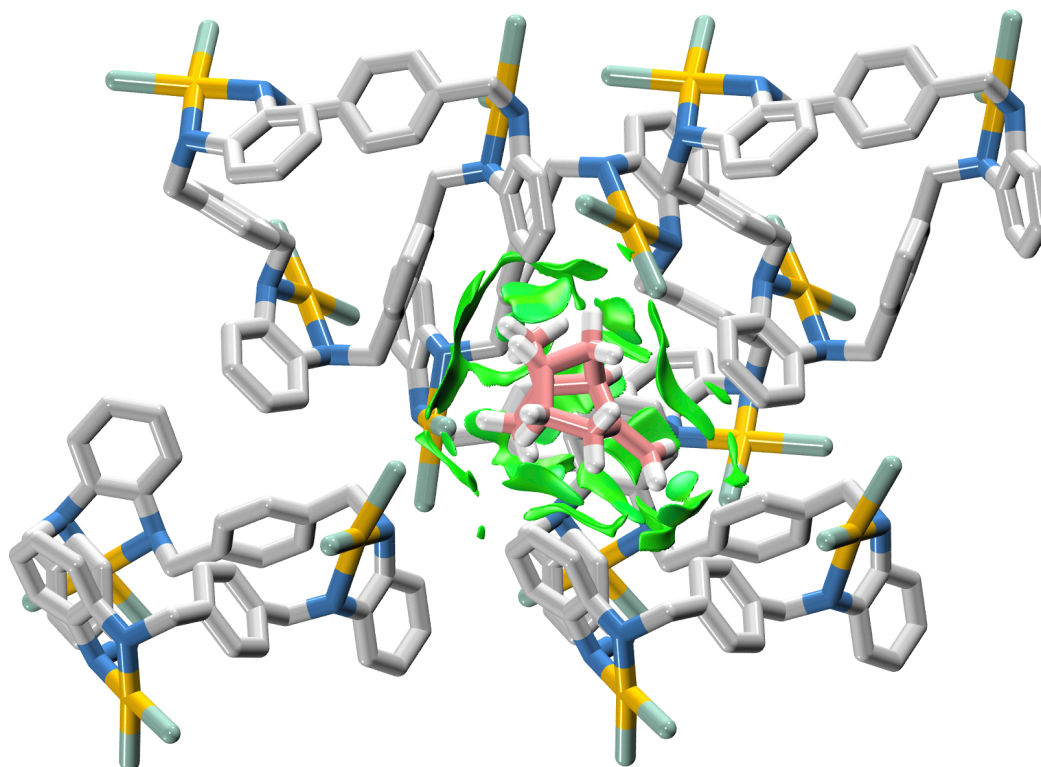

**Fig. S27** Plot of non-covalent interactions between (–)-β-pinene (**7**) and five adjacent macrocycles. Non-covalent interactions: green surface ( $s = 0.5$  a.u.,  $\rho < 0.05$  a.u.). Macrocycles and (–)-β-pinene: sticks model. MMF: Pd, yellow; Cl, green; N, blue; C, grey. **7**: C, pink; H, white. Hydrogen atoms attached to macrocycles were omitted for clarity.

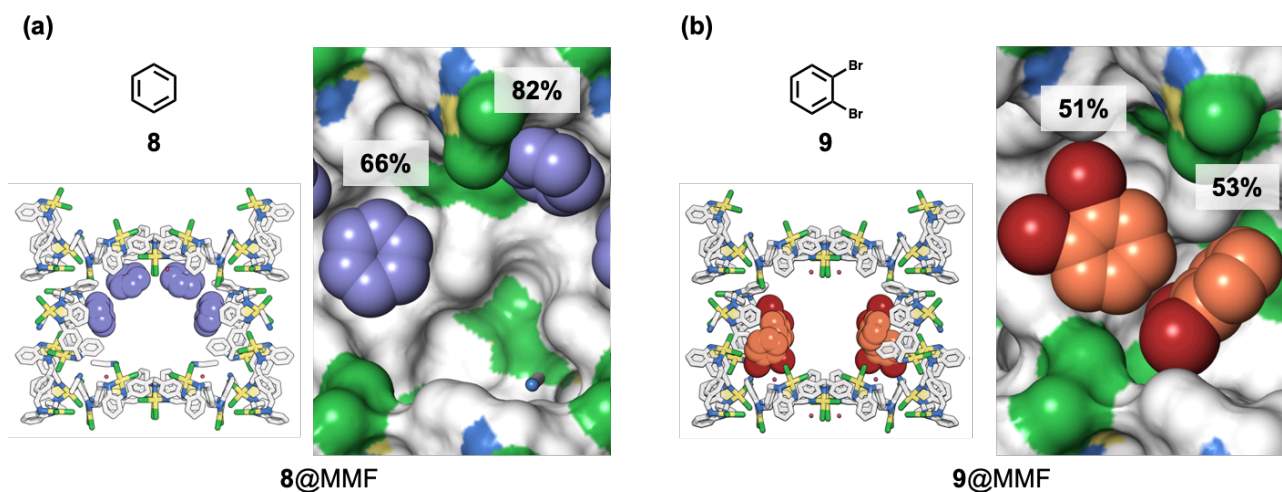

**Fig. S28** Crystal structures of MMF soaked in an acetonitrile solution of (a) benzene (**8**) and (b) 1,2-dibromobenzene (**9**).<sup>1</sup> These binding structures are for reference only, because the soaking solvent (acetonitrile) is different from the reaction solvent (chloroform). MMF: sticks model or surface model; **8** and **9**: space-filling mode; water: sticks model. MMF: Pd, yellow; Cl, green; N, blue; C, grey. **8**: C, purple. **9**: C, orange; O, red. Water: O, red. Hydrogen atoms attached to MMF were omitted for clarity.



Green and blue surface represents exposed Cl and N-H groups of MMF, respectively. The molecular occupancies of **8** and **9** were denoted.

## 6. Cyclization of nerol using 2-NBSA@MMF and 2-NBSA·H<sub>2</sub>O

### 6.1 Procedure for the cyclization of nerol using 2-NBSA@MMF

Crystals of 2-NBSA@MMF (ca. 0.5 mg, 0.1 μmol of 2-NBSA in MMF, 1 mol%) immediately after preparation and a CDCl<sub>3</sub> solution of nerol (10 mM, 1.0 mL, 10 μmol) were set in an NMR tube. This heterogeneous mixture was shaken on a shaker at 298 K and the time-course of the reaction was monitored by <sup>1</sup>H NMR measurements (500 MHz, CDCl<sub>3</sub>, 300 K). The conversion ratios of nerol (**10**) and the yields of the main products were evaluated from the internal standard of 1,1,2,2-tetrachloroethane (6 mM, 1.0 mL, 6 μmol). Treatment of nerol (**10**) with 2-NBSA@MMF resulted in 99% conversion of nerol (**10**) to limonene (**1**) (45%), terpinolene (**2**) (34%) and *p*-cymene (**5**) (4%) at 298 K after 100 h.

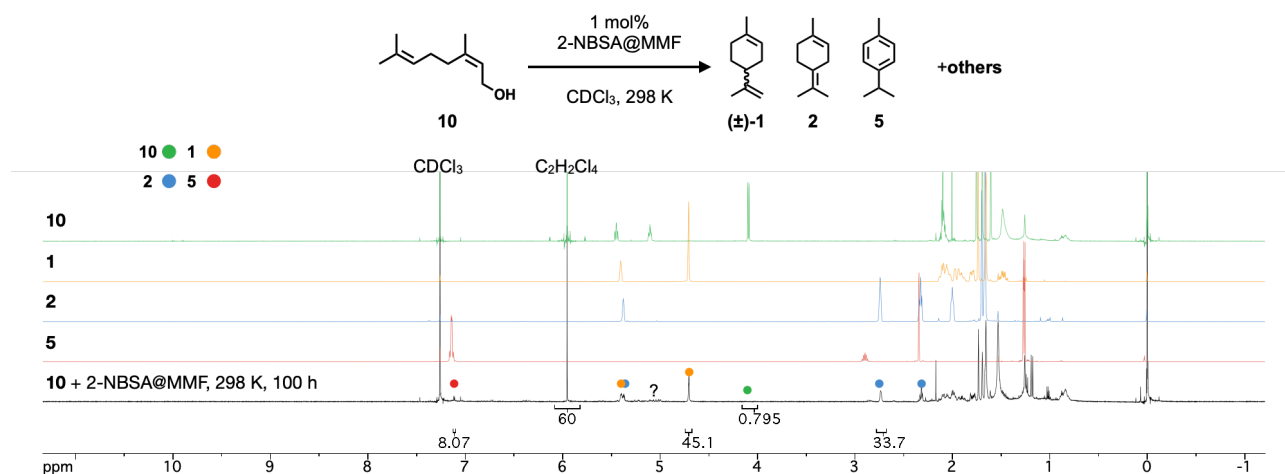

**Fig. S29** <sup>1</sup>H NMR spectra (500 MHz, CDCl<sub>3</sub>, 300 K) of **10**, **1**, **2**, **5**, and the reaction mixture of nerol (**10**) and 2-NBSA@MMF in CDCl<sub>3</sub> at 298 K after 100 h.

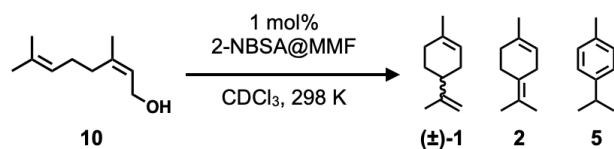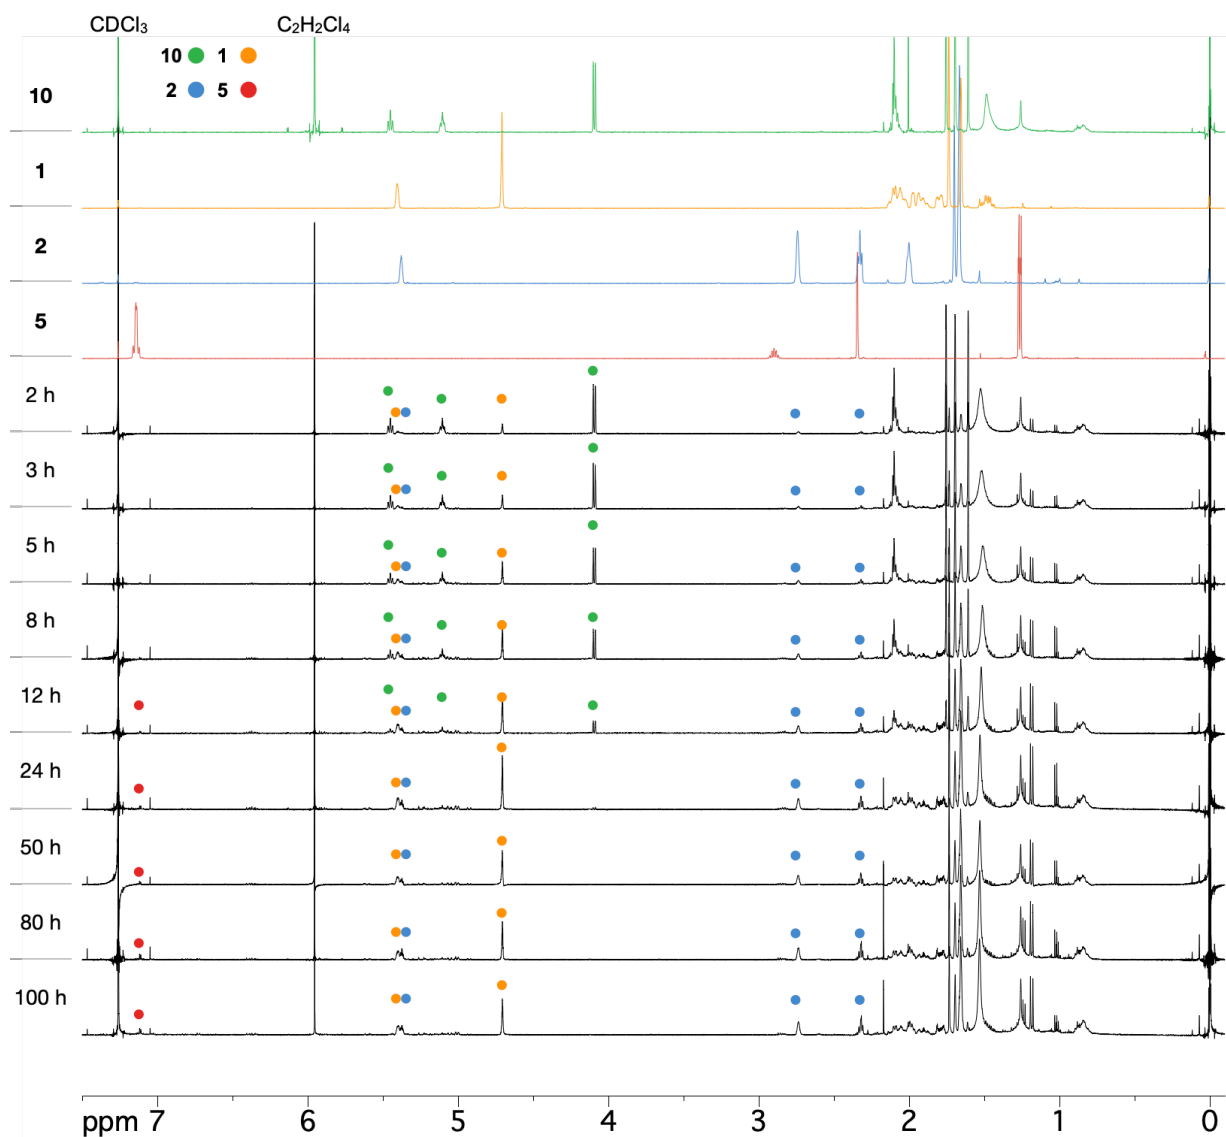

**Fig. S30** <sup>1</sup>H NMR spectra (500 MHz, CDCl<sub>3</sub>, 300 K) of **10**, **1**, **2**, **5**, and the time-course analysis of the reaction mixture of nerol (**10**) and 2-NBSA@MMF in CDCl<sub>3</sub> at 298 K.

## 6.2 Procedure for the isomerization of nerol using 2-NBSA·H<sub>2</sub>O

A CDCl<sub>3</sub> solution of 2-NBSA·H<sub>2</sub>O (1 mM, 0.1 mL, 0.1 μmol, 1 mol%) and a CDCl<sub>3</sub> solution of nerol (11 mM, 0.9 mL, 9.9 μmol) were set in an NMR tube. This mixture was shaken on a shaker at 298 K and the time-course of the reaction was monitored by <sup>1</sup>H NMR measurements (500 MHz, CDCl<sub>3</sub>, 300 K). The conversion ratios of nerol (**10**) and the yields of the main products were evaluated from the internal standard of 1,1,2,2-tetrachloroethane (4 mM, 1.0 mL, 4 μmol). Treatment of nerol (**10**) with 2-NBSA@MMF resulted in 100% conversion of nerol (**10**) to limonene (**1**) (4%), terpinolene (**2**) (13%) and *p*-cymene (**5**) (30%) at 298 K after 100 h.

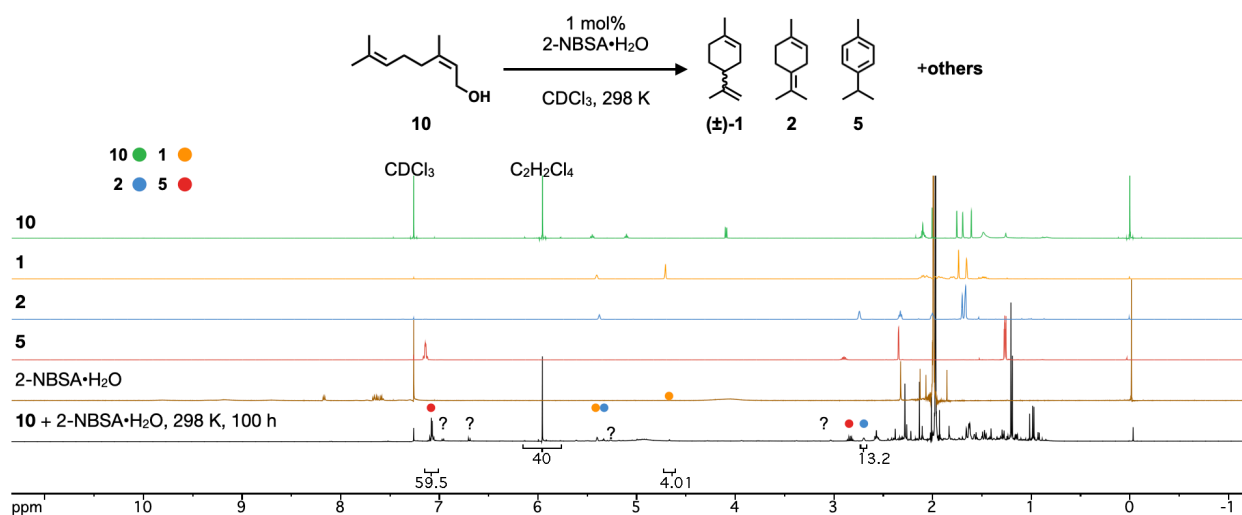

**Fig. S31** <sup>1</sup>H NMR spectra (500 MHz, CDCl<sub>3</sub>, 300 K) for **10**, **1**, **2**, **5**, 2-NBSA·H<sub>2</sub>O and the reaction mixture of nerol (**10**) and 2-NBSA·H<sub>2</sub>O in CDCl<sub>3</sub> at 298 K after 100 h.

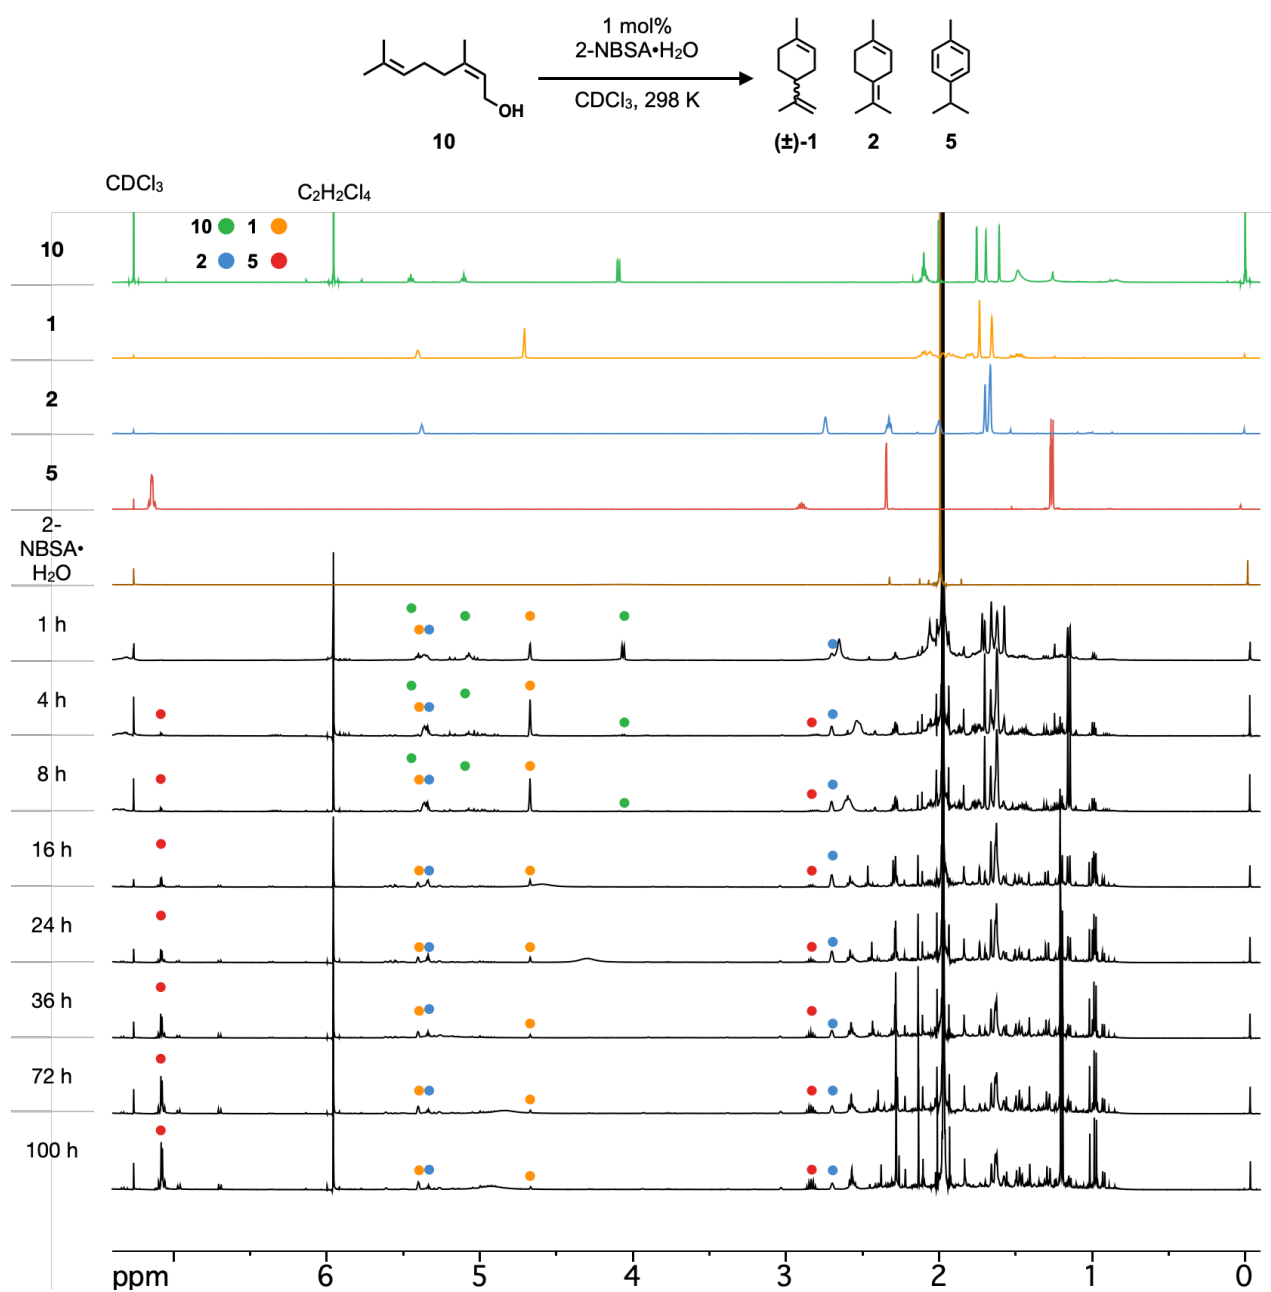

**Fig. S32** <sup>1</sup>H NMR spectra (500 MHz, CDCl<sub>3</sub>, 300 K) of **10**, **1**, **2**, **5** and 2-NBSA·H<sub>2</sub>O, and the time-course analysis of the reaction mixture of nerol (**10**) and 2-NBSA·H<sub>2</sub>O in CDCl<sub>3</sub> at 298 K.

## 7. References

1. S. Tashiro, R. Kubota and M. Shionoya, *J. Am. Chem. Soc.*, 2012, **134**, 2461–2464.
2. S. Tashiro, H. Yonezawa, R. Kubota, T. Umeki and M. Shionoya, *Chem. Commun.*, 2016, **52**, 7657–7660.
3. O. V. Dolomanov, L. J. Bourhis, R. J. Gildea, J. A. Howard and H. Puschmann, *J. Appl. Crystallogr.*, 2009, **42**, 339–341.
4. G. M. Sheldrick, *Acta Crystallogr. C*, 2015, **71**, 3–8.
5. C. B. Hübschle, G. M. Sheldrick and B. Dittrich, *J. Appl. Crystallogr.*, 2011, **44**, 1281–1284.
6. E. R. Johnson, S. Keinan, P. Mori-Sánchez, J. Contreras-García, A. J. Cohen and W. Yang, *J. Am. Chem. Soc.*, 2010, **132**, 6498–6506.
7. R. Chaudret, B. De Courcy, J. Contreras-García, E. Gloaguen, A. Zehnacker-Rentien, M. Mons and J. P. Piquemal, *Phys. Chem. Chem. Phys.*, 2014, **16**, 9876.
8. J. Contreras-García, E. R. Johnson, S. Keinan, R. Chaudret, J.-P. Piquemal, D. N. Beratan and W. Yang, *J. Chem. Theory and Comput.*, 2011, **7**, 625–632.
9. W. Humphrey, A. Dalke and K. Schulten, *J. Mol. Graph.*, 1996, **14**, 33–38.
